# Supplementary material for: A non-mosaic transchromosomic mouse model of Down syndrome carrying the long arm of human chromosome 21
Source: eLife. 2020 Jun 29;9:e56223. doi: 10.7554/eLife.56223 (PMC7358007; doi:10.7554/eLife.56223)
Supplement: Figure 2—source data 1. — HSA21 expression pattern in P1 TcMAC21 brain. [file elife-56223-fig2-data1.xlsx]

## Sheet: Figure 2–Data 1A FPKM of HSA21
Gene name	Gene start (bp)	Gene type	HSA21 PCG in TcMAC21(FPKM)	HSA21 non-PCG in TcMAC21(FPKM)	Having mouse othologs ?	Similarity	Note
AP001464.1	12999676	lincRNA		0	N
ANKRD30BP2	13038160	transcribed_unprocessed_pseudogene		5.27469	N
RNU6-614P	13047583	snRNA		0	N
ZNF355P	13095305	unprocessed_pseudogene		0	N
AJ239321.1	13120244	processed_pseudogene		0.125165	N
AJ239318.1	13305152	lincRNA		0	N
FGF7P2	13349265	unprocessed_pseudogene		0	N
ANKRD30BP1	13384249	unprocessed_pseudogene		0.123601	N
MIR3156-3	13406384	miRNA		0	N
GTF2IP2	13443373	unprocessed_pseudogene		0.0484746	N
VN1R8P	13476371	processed_pseudogene		0	N
SNX19P1	13525599	processed_pseudogene		0	N
OR4K11P	13544210	unprocessed_pseudogene		0	N
LINC01674	13546033	lincRNA		0	N
OR4K12P	13581060	unprocessed_pseudogene		0	N
POTED	13609858	protein_coding	2.41971		N
RNU6-286P	13621577	snRNA		0	N
MIR3118-1	13644775	miRNA		0	N
AL050303.3	13654073	processed_pseudogene		1.94529	N
GRAMD4P1	13665868	processed_pseudogene		0.227033	N
CXADRP1	13676022	processed_pseudogene		0.172955	N
AL050303.4	13679300	TEC		0.0823216	N
AL050303.2	13704853	processed_pseudogene		0	N
MIR8069-2	13724189	miRNA		0	N
FEM1AP1	13762338	processed_pseudogene		0.0302963	N
AL050303.1	13769932	lincRNA		0	N
TERF1P1	13776086	processed_pseudogene		0	N
FAM207CP	13792635	processed_pseudogene		0	N
GXYLT1P2	13824406	processed_pseudogene		0.0251327	N
CNN2P7	13826696	processed_pseudogene		0	N
ZNF114P1	13839118	processed_pseudogene		0	N
CYP4F29P	13843133	transcribed_unprocessed_pseudogene		0	N
SNX18P13	13905960	processed_pseudogene		0	N
ANKRD20A11P	13909574	transcribed_unprocessed_pseudogene		0	N
RHOT1P2	13936993	processed_pseudogene		0	N
RNU6-954P	13968489	snRNA		0	N
NF1P3	14000927	unprocessed_pseudogene		0	N
PPP6R2P1	14007134	unprocessed_pseudogene		0	N
FRG2MP	14019060	processed_pseudogene		0.0755236	N
AP001347.1	14027421	antisense		1.00633	N
ANKRD20A18P	14064325	unprocessed_pseudogene		0.0742864	N
RNA5SP488	14070871	rRNA_pseudogene		0	N	66 (a)
LIPI	14108813	protein_coding	0.0638204		Lipi	75.98(n)
ERLEC1P1	14143581	processed_pseudogene		1.00633	N
RBM11	14216130	protein_coding	1.46976		Rbm11	88.11 (n)
ABCC13	14236206	transcribed_unprocessed_pseudogene		0	N
HSPA13	14371115	protein_coding	9.84258		Hspa13	86.55 (n)
SAMSN1	14485228	protein_coding	0.116297		Samsn1	83.19 (n)
SAMSN1-AS1	14582202	antisense		0	N
AF127936.2	14746762	lincRNA		0	N
POLR2CP1	14757588	processed_pseudogene		0	N
AF127936.1	14761710	lincRNA		0.0968244	N
GAPDHP16	14774301	processed_pseudogene		0	N
AF127577.4	14818843	lincRNA		0	N
LINC02246	14819699	lincRNA		0	N
RBMX2P1	14829154	processed_pseudogene		0	N
AF127577.3	14918534	antisense		0	N		Deletion A
NRIP1	14961235	protein_coding	0.0681678		Nrip1	83.12 (n)	Deletion A
AF127577.1	14961309	antisense		0	N		Deletion A
AF127577.2	14971470	antisense		0	N		Deletion A
AF127577.6	15050189	TEC		0	N		Deletion A
AF127577.5	15067070	lincRNA		0	N		Deletion A
AF246928.1	15346652	TEC		0	N		Deletion A
AJ009632.2	15370500	lincRNA		0	N		Deletion A
CYCSP42	15490530	processed_pseudogene		0	N		Deletion A
AJ009632.1	15493932	lincRNA		0	N		Deletion A
RNU6-1326P	15614283	snRNA		0	N		Deletion A
RAD23BP3	15694300	processed_pseudogene		0	N		Deletion A
USP25	15730025	protein_coding	0		Usp25	86.9(n)	Deletion A
RBPMSLP	15744004	processed_pseudogene		0	N		Deletion A
MIR99AHG	15928296	lincRNA		3.79599	N
RNU6-426P	16035413	snRNA		0	N
VDAC2P1	16094415	processed_pseudogene		0	N
RPS26P5	16121310	processed_pseudogene		0	N
SNORD74B	16284696	snoRNA		0	N
AP001172.1	16291079	lincRNA		0	N
AP001172.2	16417139	lincRNA		0	N
AP000962.2	16525919	TEC		0	N
MIR99A	16539089	miRNA		0	Mir99a(MMU16)	97 (a)
MIRLET7C	16539828	miRNA		0	Mirlet7c-1(MMU16)	70 (a)
AP000962.1	16574718	lincRNA		0	N
MIR125B2	16590237	miRNA		0	Mir125b-2(MMU16)	97 (a)
RNU1-98P	16718998	snRNA		0	N
AF130359.1	16754519	lincRNA		0	N
AF212831.1	16862875	lincRNA		0	N
NEK4P1	17210469	processed_pseudogene		0.074093	N
AP000457.1	17296219	processed_pseudogene		0	N
RNU6-113P	17431547	snRNA		0	N
LINC01549	17438890	lincRNA		0	N
RPL39P40	17500679	processed_pseudogene		1.29408	N
RN7SL163P	17506453	misc_RNA		0	N
CXADR	17513043	protein_coding	16.2996		Cxadr	84.66 (n)
BTF3L4P1	17518526	processed_pseudogene		0	N
BTG3	17593653	protein_coding	7.36962		Btg3	91.4 (n)
BTG3-AS1	17611744	processed_transcript		0	N
AP000432.1	17659276	lincRNA		0.334855	N
AP000432.2	17705408	TEC		0	N
C21orf91-OT1	17763315	lincRNA		0.400897	N
C21orf91	17788974	protein_coding	0.400897		D16Ertd472e	83.97(n)
AL109761.1	17793488	antisense		0.414365	N
CHODL-AS1	17835016	lincRNA		0	N
RPL37P3	17894193	processed_pseudogene		0	N		Deletion B
CHODL	17901263	protein_coding	0		Chodl	87.67(n)	Deletion B
AF130417.1	18022370	lincRNA		0	N		Deletion B
TMPRSS15	18269116	protein_coding	0		Tmprss15	80.21 (n)	Deletion B
AL109763.1	18477358	sense_overlapping		0	N		Deletion B
MIR548XHG	18561265	lincRNA		0	N		Deletion B
AF240627.1	18614431	lincRNA		0	N		Deletion B
MIR548X	18686090	miRNA		0	N		Deletion B
PPIAP22	18857779	processed_pseudogene		0	N		Deletion B
AL157359.3	18917213	TEC		0	N		Deletion B
AL157359.2	18917934	lincRNA		0	N		Deletion B
AL157359.1	18953264	lincRNA		0	N		Deletion B
AP000431.2	19046310	lincRNA		0	N		Deletion B
AP000431.1	19130523	lincRNA		0	N		Deletion B
SLC6A6P1	19244543	processed_pseudogene		0	N		Deletion B
AP000855.1	19301613	lincRNA		0	N		Deletion B
RNU1-139P	19345148	snRNA		0	N		Deletion B
RPL37P4	19593841	processed_pseudogene		0	N		Deletion B
AP000403.1	19620695	processed_pseudogene		0	N		Deletion B
AP000568.1	19739709	processed_pseudogene		0	N		Deletion B
C1QBPP1	19759359	processed_pseudogene		0	N		Deletion B
LINC01683	19893113	lincRNA		0	N		Deletion B
LINC02573	20256752	lincRNA		0	N		Deletion B
RNU6-772P	20355748	snRNA		0	N		Deletion B
RN7SKP147	20356653	misc_RNA		0	Gm23046 (MMU2)	49 (a)	Deletion B
FDPSP6	20388334	processed_pseudogene		0	N		Deletion B
KRT18P2	20424949	processed_pseudogene		0	N		Deletion B
RPS3AP1	20430443	processed_pseudogene		0	N		Deletion B
AP001506.1	20597953	processed_pseudogene		0	N		Deletion B
LINC00320	20742590	lincRNA		0	N		Deletion B
PPIAP1	20828127	processed_pseudogene		0	N		Deletion B
NCAM2	20998409	protein_coding	0		Ncam2	86.85(n)	Deletion B
AP001136.1	21223295	antisense		0	N		Deletion B
AP001117.1	21566763	lincRNA		0	N		Deletion B
AF241725.1	21655038	lincRNA		0	N		Deletion B
LINC00317	21723293	lincRNA		0	N		Deletion B
LINC01425	21746973	lincRNA		0	N		Deletion B
AP000472.1	21933315	lincRNA		0	N		Deletion B
LINC01687	22008944	lincRNA		0	N		Deletion B
LINC00308	22098617	lincRNA		0	N		Deletion B
AP000705.2	22134698	processed_pseudogene		0	N		Deletion B
AP000705.1	22153950	processed_pseudogene		0	N		Deletion B
RNU4-45P	22205192	snRNA		0	N		Deletion B
AP000561.1	22209939	lincRNA		0	N		Deletion B
MAPK6P2	22436290	processed_pseudogene		0	N		Deletion B
AP000959.1	22500604	lincRNA		0	N		Deletion B
AP000949.1	22882582	processed_pseudogene		0	N		Deletion B
AP001116.1	23065491	lincRNA		0	N		Deletion B
MIR6130	23079284	miRNA		0	N		Deletion B
ZNF299P	23090028	processed_pseudogene		0	N		Deletion B
MSANTD2P1	23101223	processed_pseudogene		0	N		Deletion B
AP001255.1	23106928	lincRNA		0	N		Deletion B
RNU2-55P	23281736	snRNA		0	N		Deletion B
AP000459.2	23361104	lincRNA		0	N		Deletion B
EEF1A1P1	23390258	processed_pseudogene		0	N		Deletion B
TUBAP	23407658	processed_pseudogene		0	N		Deletion B
AP000459.1	23477641	lincRNA		0	N		Deletion B
AP000474.1	23888798	lincRNA		0	N		Deletion B
AP000477.2	23960905	lincRNA		0	N		Deletion B
AP000477.1	24043257	lincRNA		0	N
AP000470.1	24155170	lincRNA		0	N
LINC01689	24304546	lincRNA		2.1445	N
LINC01684	24428740	lincRNA		0.784508	N
LINC01692	24840550	lincRNA		0.0540677	N
AP000402.1	24886676	lincRNA		0	N
AP000146.1	24938431	lincRNA		0	N
AP001342.1	25031005	processed_pseudogene		0	N
AP000235.1	25055535	lincRNA		0	N
AP000233.2	25095022	lincRNA		0.156427	Gm26028 (MMU18)	56 (a)
RN7SKP236	25101132	misc_RNA		0	N
AP000233.1	25127469	lincRNA		0.043154	N
AP001341.1	25169431	lincRNA		0	N
RNA5SP489	25202207	rRNA_pseudogene		0	N
RPL13AP7	25361821	processed_pseudogene		0.735882	N
AP001340.1	25371827	TEC		0	N
LINC00158	25385820	lincRNA		0.11202	N
AP000221.1	25515473	lincRNA		0	N
MIR155HG	25561909	lincRNA		0.0380404	Mir155 (MMU16)	91(a)
MIR155	25573980	miRNA		0.0380404	N
AP000223.1	25582770	antisense		0.506697	N
MRPL39	25585656	protein_coding	4.50746		Mrpl39	84.7 (n)
JAM2	25639258	protein_coding	2.75162		Jam2	83.45 (n)
RNGTTP1	25643489	processed_pseudogene		0	N
FDX1P2	25692180	processed_pseudogene		0	N
ATP5PF	25716503	protein_coding	59.5415		Atp5j	88.27 (n)
GABPA	25734570	protein_coding	3.67876		Gabpa	89.7 (n)
LLPHP2	25762938	processed_pseudogene		0	N
APP	25880550	protein_coding	211.048		App	89.36 (n)
AP001442.1	25928754	processed_transcript		0.114924	N
RNU6-123P	25943044	snRNA		0	N
AP001439.1	26158091	antisense		0.200682	N
AP000229.1	26170871	lincRNA		0.566517	N
RNU6-926P	26190707	snRNA		0	N
AP001595.1	26349780	lincRNA		0	N
AP001596.1	26378552	antisense		0.257574	N
CYYR1-AS1	26393635	antisense		0.0905675	N
AP001596.2	26459903	lincRNA		0	N
CYYR1	26466209	protein_coding	1.24778		Cyyr1	82.25 (n)
ADAMTS1	26835755	protein_coding	0.361715		Adamts1	81.04 (n)
AP001599.1	26889376	antisense		0	N		Deletion C
ADAMTS5	26917922	protein_coding	0		Adamts5	85.86 (n)	Deletion C
MIR4759	26953961	miRNA		0	N		Deletion C
GPX1P2	27143344	processed_pseudogene		0	N		Deletion C
AP001605.1	27358885	lincRNA		0	N		Deletion C
AP001604.1	27361164	lincRNA		0	N		Deletion C
EIF4A1P1	27367014	processed_pseudogene		0	N		Deletion C
RPL10P1	27420380	processed_pseudogene		0	N		Deletion C
NCSTNP1	27492118	processed_pseudogene		0	N		Deletion C
LINC01673	27638693	lincRNA		0	N		Deletion C
LINC00113	27722379	lincRNA		0	N		Deletion C
AJ006995.1	27954922	lincRNA		0	N		Deletion C
LINC00314	28013363	lincRNA		0	N		Deletion C
LINC01697	28048404	processed_transcript		0.0170101	N		Deletion C
LINC01695	28116094	lincRNA		0.0129562	N		Deletion C
AF165147.1	28439346	lincRNA		5.583	N
LINC00161	28539318	lincRNA		0.35054	N
RF00026	28743208	snRNA		0	N
N6AMT1	28872191	protein_coding	3.20163		N6amt1	84.11 (n)
HSPD1P7	28887280	processed_pseudogene		0.0181125	N
THUMPD1P1	28901779	processed_pseudogene		0	N
LTN1	28928144	protein_coding	6.04537		Ltn1	84.24 (n)
RPL23P2	28997613	processed_pseudogene		11.0094	N
RWDD2B	29004384	protein_coding	4.13483		Rwdd2b	84.83 (n)
AF129075.2	29024255	antisense		0	N
USP16	29024629	protein_coding	8.58814		Usp16	84.94 (n)
CCT8Cct8	29055805	protein_coding	37.3608		Cct8	88.63 (n)
AF129075.1	29058073	sense_intronic		0.289664	N
AF129075.3	29063446	antisense		0	N
MAP3K7CL	29077471	protein_coding	4.65911		Map3k7cl	77 (a)
RPL12P9	29127701	processed_pseudogene		0.448904	N
RF00012	29180425	snoRNA		0	N
AF124730.1	29182027	antisense		0.129916	N
LINC00189	29193480	sense_overlapping		0	N
BACH1	29194071	protein_coding	3.48748		Bach1	79.68 (n)
GAPDHP14	29222321	processed_pseudogene		0.0685177	N
BACH1-IT1	29351634	sense_intronic		0.080117	N
AP000240.1	29359002	sense_intronic		0.0825925	N
BACH1-AS1	29370019	lincRNA		0.0482356	N
BACH1-IT2	29370497	lincRNA		0.231547	N
BACH1-IT3	29496047	sense_intronic		0	N
GRIK1	29536933	protein_coding	4.28641		Grik1	90.71(n)
AP000238.1	29657406	antisense		0	N
GRIK1-AS1	29748175	antisense		0.0729692	N
AF096876.1	30089717	lincRNA		0	N
CLDN17	30165564	protein_coding	0		Cldn17	81.4 (n)
LINC00307	30209151	lincRNA		0	N
CLDN8	30214006	protein_coding	0		Cldn8	82.96 (n)
RPL8P2	30263380	processed_pseudogene		0	N
KRTAP24-1	30281309	protein_coding	0		Krtap24-1	70.7 (n)
KRTAP25-1	30289145	protein_coding	0		N
KRTAP26-1	30319124	protein_coding	0		Krtap26-1	69.68 (n)
KRTAP27-1	30337013	protein_coding	0		Krtap27-1	70.79 (n)
KRTAP23-1	30348399	protein_coding	0		N
KRTAP13-6P	30356515	unprocessed_pseudogene		0	N
KRTAP13-2	30371391	protein_coding	0		2310034C09Rik	75.1(n)
MIR4327	30375294	miRNA		0	N
KRTAP13-1	30396074	protein_coding	0		Krtap13-1	76.71 (n)
KRTAP13-3	30425265	protein_coding	0		Krtap13	48 (a)
KRTAP13-4	30430230	protein_coding	0		4930553J12Rik	46 (a)
KRTAP13-5P	30436466	unprocessed_pseudogene		0	N
KRTAP15-1	30440275	protein_coding	0		Krtap15	71.08 (n)
KRTAP19-1	30479699	protein_coding	0		N
KRTAP19-2	30487043	protein_coding	0		N
KRTAP19-3	30491464	protein_coding	0		N
KRTAP19-4	30496824	protein_coding	0		N
KRTAP19-5	30501657	protein_coding	0		N
KRTAP19-9P	30510307	unprocessed_pseudogene		0	N
KRTAP19-10P	30514613	unprocessed_pseudogene		0	N
AP000567.1	30526546	unprocessed_pseudogene		0	N
KRTAP19-11P	30537278	unprocessed_pseudogene		0	N
KRTAP19-6	30541535	protein_coding	0		N
KRTAP19-7	30560875	protein_coding	0		N
KRTAP22-2	30590105	protein_coding	0		N
KRTAP6-3	30592440	protein_coding	0		N
KRTAP6-2	30598590	protein_coding	0		N
KRTAP22-1	30601087	protein_coding	0		N
KRTAP6-1	30613431	protein_coding	0		N
KRTAP20-1	30616425	protein_coding	0		N
KRTAP20-4	30620627	protein_coding	0		N
KRTAP20-2	30635236	protein_coding	0		N
KRTAP20-3	30642864	protein_coding	0		N
KRTAP21-3	30718525	protein_coding	0		N
KRTAP21-4P	30741780	unprocessed_pseudogene		0	N
KRTAP21-2	30746794	protein_coding	0		N
KRTAP21-1	30755015	protein_coding	0		N
AP000244.1	30762682	unprocessed_pseudogene		0	N
KRTAP8-2P	30802242	unprocessed_pseudogene		0	N
KRTAP8-3P	30806932	unprocessed_pseudogene		0	N
KRTAP8-1	30812697	protein_coding	0		Krtap8-1	84 (a)
KRTAP7-1	30829039	protein_coding	0		Krtap7-1	82.95 (n)
KRTAP11-1	30880644	protein_coding	0		Krtap11-1	82.82 (n)
KRTAP19-8	31038159	protein_coding	0		N
UBE3AP2	31060600	processed_pseudogene		0.0263787	N
TIAM1	31118416	protein_coding	6.33115		Tiam1	89.38 (n)
AP000563.1	31452466	processed_pseudogene		0	N
AP000251.1	31559245	lincRNA		0.278301	N
FBXW11P1	31627127	processed_pseudogene		1.12134	N
AP000253.1	31653593	lincRNA		0.346309	N
SOD1	31659622	protein_coding	98.8571		Sod1	83.77 (n)
RF01241	31664306	snoRNA		0.795329	N
AP000254.1	31666728	antisense		3.44974	N
SCAF4	31671033	protein_coding	6.82538		Scaf4	88.3 (n)
HMGN1P2	31706555	processed_pseudogene		0	N
AP000255.1	31735732	lincRNA		0.549707	N
TPT1P1	31840341	processed_pseudogene		0	N
HUNK	31873020	protein_coding	5.046		Hunk	87.35 (n)
HUNK-AS1	32020966	antisense		0	N
LINC00159	32080316	lincRNA		0	N
AP000265.1	32259804	lincRNA		0	N
MIS18A	32268228	protein_coding	2.8221		Mis18a	80.07
MIS18A-AS1	32277863	antisense		0.0859731	N
MRAP	32291813	protein_coding	0.0368081		Mrap	79.77 (n)
AP000266.1	32306464	antisense		0	N
URB1	32311018	protein_coding	4.58655		Urb1	79.31 (n)
SNORA80A	32377187	snoRNA		0	N
URB1-AS1	32393130	lincRNA		3.80905	N
EVA1C	32412006	protein_coding	2.96892		Eva1c	85.76 (n)
EXOSC3P1	32496812	processed_pseudogene		0.0727741	N
RF00438	32538299	snoRNA		0	N
RNA5SP490	32563075	rRNA_pseudogene		1.59502	Gm22164 (MMU14)	58 (a)
LINC00846	32572238	3prime_overlapping_ncRNA			N
TCP10L	32573721	protein_coding			N
CFAP298	32592079	protein_coding	20.0423		1110004E09Rik	84.37 (n)
OR7E23P	32621084	unprocessed_pseudogene		0	N
AP000275.1	32624416	processed_pseudogene		0.100979	N
SYNJ1	32628759	protein_coding	10.7838		Synj1	86.97 (n)
PAXBP1-AS1	32728115	antisense		1.74242	N
PAXBP1	32733899	protein_coding	12.4431		Paxbp1	89.79 (n)
C21orf62-AS1	32772100	antisense		0.0815202	N
C21orf62	32790673	protein_coding	0.351459		4932438H23Rik	79.4 (n)
AP000280.1	32790673	TEC		0	N
AP000281.1	32841496	processed_pseudogene		0	N
AP000281.2	32844367	antisense		0	N
AP000282.1	32913649	antisense		0	N
LINC01690	32958888	lincRNA		0	N
OLIG2	33025935	protein_coding	2.42165		Olig2	88.13 (n)
LINC00945	33057829	lincRNA		0	N
OLIG1	33070141	protein_coding	8.2055		Olig1	84.56 (n)
AP000289.1	33111699	lincRNA		0.0224973	N
AP000290.1	33156632	antisense		0	N
LINC01548	33165470	lincRNA		0	N
AP000295.1	33229901	protein_coding			Gm21970	52 (a)
IFNAR2	33229901	protein_coding	7.82719		Ifnar2	64.91 (n)
IL10RB-DT(IL10RB-AS1)	33263873	antisense		1.16335	N
IL10RB	33266367	protein_coding			Il10rb	76.65 (n)
IFNAR1	33324429	protein_coding	4.71079		Ifnar1	66.05 (n)
USF1P1	33334571	processed_pseudogene		0	N
IFNGR2	33402896	protein_coding	13.4129		Ifngr2	68.87 (n)
TMEM50B	33432485	protein_coding	11.3277		Tmem50b	87.9 (n)
RPS5P3	33481580	processed_pseudogene		0	N
AP000302.1	33482499	antisense		0.152118	N
DNAJC28	33485530	protein_coding	1.29672		Dnajc28	78.57 (n)
GART	33503931	protein_coding	19.4637		Gart	83.2 (n)
BTF3P6	33518610	processed_pseudogene		0.145142	N
SON	33543038	protein_coding	39.1344		Son	87.54 (n)
MIR6501	33550662	miRNA		0	N
DONSON	33559542	protein_coding	1.65571		Donson	80 (n)
AP000311.1	33584687	protein_coding	0		Atp5o	38 (a)
CRYZL1	33589341	protein_coding	24.6556		Cryzl1	88.79 (n)
ITSN1	33642400	protein_coding	25.0076		Itsn1	88.16 (n)
ATP5PO	33903453	protein_coding	126.81		Atp5o	79.81 (n)
LINC00649	33915534	antisense		2.24241	N
RN7SL740P	33918995	misc_RNA		0	N
AP000569.1	33967101	lincRNA		0	N
MRPS6	34073224	protein_coding	28.2479		Mrps6	84 (n)
SLC5A3	34073578	protein_coding			Slc5a3	90.71 (n)
AP000317.2	34073592	processed_transcript		0	N
RPS5P2	34135432	processed_pseudogene		0	N
LINC00310	34157724	lincRNA		0.413812	N
AP000317.1	34205055	lincRNA		0	N
KCNE2	34364024	protein_coding	0.57189		Kcne2	82.66 (n)
AP000320.1	34370802	antisense		0.704724	N
SMIM11A	34375480	protein_coding	0.548931		Smim11	84 (a)
FAM243A(C21orf140)	34400317	protein_coding	0		4930563D23Rik	78.35 (n)
AP000322.2	34412200	lincRNA		0.712198	N
SMIM34A	34418715	protein_coding	0		N
AP000322.1	34425508	lincRNA		0.0709683	N
KCNE1	34446688	protein_coding	0.076437		Kcne1	76 (a)
RCAN1	34513142	protein_coding	0.193183		Rcan1	87.28 (n)
CLIC6	34669389	protein_coding	3.49691		Clic6	74.14 (n)
LINC00160	34723807	lincRNA		0	N
LINC01426	34745757	lincRNA		0.786128	N
RUNX1	34787801	protein_coding	2.34434		Runx1	91.47 (n)
AP000331.1	34836286	antisense		0	N
AF015262.1	35136638	lincRNA		6.62379	N
RPL34P3	35472095	processed_pseudogene		0	N
EZH2P1	35599732	processed_pseudogene		0	N
AF015720.1	35713139	lincRNA		0	N
MIR802	35720715	miRNA		0	Mir802(MMU16)	85 (a)
RPS20P1	35724747	processed_pseudogene		0	N
PPP1R2P2	35887195	processed_pseudogene		0.169566	N
LINC01436	36005338	lincRNA		0.423253	N
RPL23AP3	36016079	processed_pseudogene		0.0792246	N
SETD4	36034541	protein_coding	11.61		Setd4	78.28 (n)
RIMKLBP1	36050214	processed_pseudogene		0.160278	N
AP000688.4	36060432	antisense		0	N
RNU6-992P	36066545	snRNA		0	N
AP000688.1	36069642	sense_intronic		0	N
CBR1	36069941	protein_coding	15.8982		Cbr1	83.87 (n)
AP000688.3	36082859	lincRNA		0.101682	N
AP000688.2	36104881	lincRNA		0	N
MEMO1P1	36130489	processed_pseudogene		0	N
CBR3-AS1	36131767	processed_transcript		0.0399999	N
RPS9P1	36132450	processed_pseudogene		0	N
CBR3	36135079	protein_coding	0		Cbr3	83.75 (n)
DOP1B(DOPEY2)	36156782	protein_coding	0.0613286		Dopey2	83.1 (n)
RPL3P1	36168970	processed_pseudogene		0.439718	N
SRSF9P1	36295173	processed_pseudogene		0	N
AP000692.2	36319792	antisense		0.294289	N
MORC3	36320189	protein_coding			Morc3	82.82 (n)
AP000692.1	36360630	sense_overlapping			N
CHAF1B	36385392	protein_coding	3.09363		Chaf1b	81.84 (n)
ATP5MFP1	36388878	processed_pseudogene		0	N
AP000695.1	36430360	antisense		0.18152	N
AP000695.2	36445731	antisense		0.0470394	N
CLDN14	36460621	protein_coding	0.0831617		Cldn14	86.47 (n)
AP000695.3	36485867	TEC		0.0317737	N
PSMD4P1	36485983	processed_pseudogene		0.11381	N
AP000696.1	36632681	lincRNA		0.718356	N
AP000697.1	36698773	antisense		0	N
SIM2	36699133	protein_coding	0.737634		Sim2	88.31 (n)
HLCS	36750888	protein_coding	4.40028		Hlcs	78.59 (n)
HLCS-IT1	36803984	sense_intronic		0	N
RNA5SP491	36851911	rRNA_pseudogene		0	n-R5s58(MMU12)	78 (a)
DPRXP5	36943267	processed_pseudogene		0	N
AP000704.1	36966492	lincRNA		0.603759	N
MRPL20P1	36994643	processed_pseudogene		0	N
RIPPLY3	37006150	protein_coding	0.0791828		Ripply3	68.28 (n)
RNU6-696P	37045530	snRNA		0	N
PIGP	37059170	protein_coding	6.89456		Pigp	86.87 (n)
TTC3	37073226	protein_coding	87.9523		Ttc3	82.23 (n)
AP001429.1	37100814	sense_intronic		0.0676733	N
TTC3-AS1	37187666	antisense		2.1525	N
DSCR9	37208503	lincRNA		1.19028	N
RN7SL678P	37215605	misc_RNA		0	N
AP001432.1	37221419	lincRNA		0.0933299	N
VPS26C(DSCR3)	37223420	protein_coding	15.2806		Dscr3	85.25 (n)
AP001412.1	37267784	antisense		0	N
AP001437.1	37365477	antisense		0.572397	N
DYRK1A	37365573	protein_coding	17.5915		Dyrk1a	93.93 (n)
KCNJ6	37607373	protein_coding	1.06518		Kcnj6	91.33 (n)
KCNJ6-AS1	37717102	sense_intronic		0	N
DSCR4	37951425	lincRNA		0.401494	N
DSCR4-IT1	38006544	sense_intronic		0.0902195	N
DSCR8	38121451	lincRNA		3.47122	N
KCNJ15	38155549	protein_coding			Kcnj15	85.78 (n)
AP001425.1	38204141	transcribed_processed_pseudogene		0	N
DSCR10	38206156	sense_intronic		4.65628	N
AP001434.1	38237217	lincRNA		0	N
SPATA20P1	38238227	processed_pseudogene		0	N
LINC01423	38323635	lincRNA		0	N
ERG	38380027	protein_coding	0.36729		Erg	89.85 (n)
SNRPGP13	38502445	processed_pseudogene		0	N
LINC00114	38739021	lincRNA		0	N
ETS2	38805307	protein_coding	4.25749		Ets2	85.94 (n)
AP001042.1	38846247	lincRNA		0	N
AP001043.1	38863676	lincRNA		0	N
AP001043.2	38888772	lincRNA		0	N
RF00091(SNORA62)	38894785	snoRNA		0	N
RPSAP64	38894917	processed_pseudogene		0	N
LINC01700	38974429	lincRNA		0	N
AF064858.1	38988707	lincRNA		0	N
AF064858.2	39028536	lincRNA		0	N
RPL23AP12	39127568	processed_pseudogene		0	N
PCBP2P1	39171130	processed_pseudogene		0.0328734	N
RF02271	39171462	misc_RNA		0	N
PSMG1	39174769	protein_coding	15.6183		Psmg1	80.9 (n)
BRWD1	39184176	protein_coding	25.6729		Brwd1	81.6 (n)
AF129408.1	39184469	antisense		4.84673	N
TIMM9P2	39216624	processed_pseudogene		0	N
BRWD1-IT1	39217093	sense_overlapping		0	N
METTL21AP1	39235386	processed_pseudogene		0	N
BRWD1-AS2	39313935	antisense		0.803223	N
BRWD1-AS1	39315707	antisense		0.0975238	N
HMGN1	39342315	protein_coding	70.3674		Hmgn1	81.05 (n)
RNF6P1	39373763	processed_pseudogene		0	N
WRB	39377698	protein_coding	30.0914		Wrb	86.21 (n)
LCA5L	39405844	protein_coding	2.3938		Lca5l	70.76 (n)
SH3BGR	39445855	protein_coding	6.92035		Sh3bgr	68 (a)
MIR6508	39447010	miRNA		0	N
MYL6P2	39488327	processed_pseudogene		0	N
RPS26P4	39491544	processed_pseudogene		0	N
AF121897.1	39525583	processed_pseudogene		0	N
B3GALT5	39556442	protein_coding	0.325928		B3galt5	75.35 (n)
B3GALT5-AS1	39597147	antisense		0.577249	N
AF064860.1	39630271	sense_overlapping		0	N
AF064860.2	39727755	lincRNA		0.0961676	N
IGSF5	39745407	protein_coding	0.136356		Igsf5	66 (n)
PCP4	39867438	protein_coding	25.9889		Pcp4	89.25 (n)
DSCAM	40010999	protein_coding	3.06501		Dscam	90.11 (n)
MIR4760	40212352	miRNA		0	N
DSCAM-AS1	40383083	antisense		0	N
RF00432(SNPRA51)	40513144	snoRNA		0	N
DSCAM-IT1	40615378	sense_intronic		0	N
YRDCP3	40863994	processed_pseudogene		0	N
LINC00323	41141493	antisense		0.508625	N
MIR3197	41167557	miRNA		0	N
BACE2	41167801	protein_coding	3.39481		Bace2	84.58 (n)
PLAC4	41175231	antisense		0.0565949	N
BACE2-IT1	41180097	antisense		0	N
FAM3B	41304212	protein_coding	0.958917		Fam3b	79.02 (n)
MX2	41361999	protein_coding	4.29703		Mx2	77.92 (n)
MX1	41420304	protein_coding	1.73429		Mx1	77.27 (n)
AP001610.1	41441056	antisense		0.028346	N
TMPRSS2	41464305	protein_coding	0.483407		N
RF00421(SNORA32)	41539206	snoRNA		0	N
AP001610.2	41559125	lincRNA		0	N
AP006748.1	41576135	lincRNA		0	N
AP006748.2	41580475	lincRNA		0	N
LINC00111	41679181	lincRNA		0	N
LINC00479	41711520	lincRNA		0.152304	N
LINC00112	41716436	antisense		0	N
RIPK4	41739369	protein_coding	0		Ripk4	84.91 (n)
AP001615.1	41739373	antisense		0	N
MIR6814	41746772	miRNA		0	N
PRDM15	41798225	protein_coding	3.38301		Prdm15	85.32(n)
AP001619.2	41870633	antisense		0.587355	N
AP001619.1	41874756	sense_intronic		0	N
RF00334(SNORA3)	41882205	snoRNA		0	N
C2CD2	41885112	protein_coding	9.60761		C2cd2	76.6 (n)
ZBTB21	41986831	protein_coding	1.69286		Zbtb21	83.04 (n)
ZNF295-AS1	42009194	lincRNA		0.134587	N
UMODL1	42062959	protein_coding	0.011196		Umodl1	72.96 (n)
UMODL1-AS1	42102134	sense_overlapping		0.126126	N
ABCG1	42199689	protein_coding	1.302		Abcg1	87.69 (n)
RNA5SP492	42221173	rRNA_pseudogene		0	N
TFF3	42311667	protein_coding	0.183236		Tff3	74.58 (n)
TFF2	42346357	protein_coding	0.127666		Tff2	83.33 (n)
TFF1	42362282	protein_coding	0		Tff1	71.6 (n)
TMPRSS3	42371837	protein_coding	0		Tmprss3	84.55 (n)
UBASH3A	42403447	protein_coding	0		Ubash3a	81.86 (n)
RNU6-1149P	42417497	snRNA		0	N
RSPH1	42472486	protein_coding	3.11871		Rsph1	80.27 (n)
SLC37A1	42496008	protein_coding	6.23685		Slc37a1	83.24 (n)
AP001625.3	42496539	sense_intronic		0	N
AP001625.1	42508624	sense_intronic		2.00955	N
AP001625.2	42560374	antisense		0	N
LINC01671	42599280	lincRNA		0	N
AP001626.1	42648271	antisense		0.0925649	N
PDE9A	42653621	protein_coding	2.18472		Pde9a	87.4 (n)
AP001627.1	42733594	antisense		0.0342283	N
LINC01668	42777819	lincRNA		0	N
AP001628.2	42781074	lincRNA		0	N
AP001628.1	42831040	lincRNA		0	N
WDR4	42843094	protein_coding	5.31804		Wdr4	79.92 (n)
NDUFV3	42879644	protein_coding	7.88858		Ndufv3	65.87 (n)
ERVH48-1	42916803	lincRNA		0	N
MIR5692B	42950928	miRNA		0	N
AP001630.1	42964639	antisense		0	N
PKNOX1	42974510	protein_coding	2.87769		Pknox1	87.61 (n)
CBS	43053191	protein_coding	27.7637		Cbs	82.66 (n)
U2AF1	43092956	protein_coding	4.19253		U2af1	86.61 (n)
MRPL51P2	43115334	processed_pseudogene		0	N
FRGCA	43140523	antisense		0	N
AP001631.1	43159066	lincRNA		0	N
CRYAA	43169008	protein_coding	0.055426		Cryaa	88.44 (n)
LINC00322	43322417	lincRNA		0	N
LINC01679	43358147	lincRNA		0.0738993	N
AP001046.1	43363332	lincRNA		0.0103929	N
SIK1	43414483	protein_coding	0		Sik1	80.39 (n)
LINC00319	43446601	lincRNA		0	N
LINC00313	43462094	lincRNA		0.263283	N
AP001048.1	43465309	lincRNA		0.166534	N
HSF2BP	43529186	protein_coding	1.201		Hsf2bp	85.43 (n)
RPL31P1	43551229	processed_pseudogene		0	N
H2BFS	43565189	protein_coding	0.0806959		N
MIR6070	43609887	miRNA		0	N
RRP1B	43659560	protein_coding	7.24296		Rrp1b	74.65 (n)
PDXK	43719094	protein_coding	24.5337		Pdxk	84.72 (n)
AP001052.1	43748365	pseudogene		3.16977	N
CSTB	43772511	protein_coding	11.9492		Cstb	77.21 (n)
TMEM97P1	43783123	processed_pseudogene		0	N
RRP1	43789513	protein_coding	21.2896		Rrp1	58 (a)
AATBC	43805758	antisense		1.84173	N
MYL6P1	43855890	processed_pseudogene		0	N
AGPAT3	43865223	protein_coding	5.16267		Agpat3	86.08 (n)
RNU6-859P	43919795	snRNA		0	N
RNU6-1150P	43996322	snRNA		0	N
TRAPPC10	44012309	protein_coding	11.2222		Trappc10	84.95 (n)
H2AFZP1	44046347	processed_pseudogene		0	N
PWP2	44107373	protein_coding	1.41846		Pwp2	84.96 (n)
GATD3A(C21orf33)	44133610	protein_coding	3.6967		D10Jhu81e	83.08 (n)
LINC01678(AP001055.6)	44158740	lincRNA		0.0378305	N
AP001056.2	44172169	lincRNA		0	N
AP001056.1	44175489	lincRNA		0	N
AP001057.1	44200616	processed_transcript		0	N
ICOSLG	44217014	protein_coding	0.0777412		Icoslg	61.58 (n)
AP001059.3	44241847	lincRNA		0	N
AP001059.2	44244545	lincRNA		0.0836252	N
DNMT3L	44246339	protein_coding	0		Dnmt3l	71.63 (n)
AP001059.1	44250813	antisense		0	N
AIRE	44285838	protein_coding	0.0751814		Aire	76.74 (n)
PFKL	44300051	protein_coding	11.3667		Pfkl	87.22 (n)
CFAP410(C21orf2)	44328944	protein_coding	1.60983		N
AP001062.3	44328944	sense_overlapping		1.66891	1810043G02Rik(MMU10)	79.38 (n)
AP001062.1	44331234	antisense		0	N
AP001062.2	44339376	antisense		0	N
AP001063.1	44347767	lincRNA		0	N
TRPM2	44350163	protein_coding	8.00382		Trpm2	83.5 (n)
TRPM2-AS	44414588	antisense		4.69561	Gm22871 (MMU10)	83 (a)
RF00285(SNOZ6)	44437121	snoRNA		0	N
LRRC3-DT	44450986	antisense		2.45888	N
LRRC3	44455510	protein_coding	2.87739		Lrrc3	79.64 (n)
MTCYBP21(AP001065.7)	44469929	processed_pseudogene		0.651354	N
MTND6P21	44472895	processed_pseudogene		0.228437	N
MTND5P1	44473723	processed_pseudogene		0.537943	N
AP001065.1	44477850	lincRNA		0	N
LINC02575	44485577	lincRNA		0.422665	N
AP001065.2	44494874	lincRNA		0	N
TSPEAR	44497892	protein_coding	1.97432		Tspear	81.79 (n)
TSPEAR-AS1	44506807	antisense		15.4023	N
TSPEAR-AS2	44517216	antisense		0	N
KRTAP10-1	44538981	protein_coding	0		Gm7138	58 (a)
KRTAP10-2	44550357	protein_coding	0		Gm3250	57 (a)
KRTAP10-3	44557790	protein_coding	0		Gm3238	55 (a)
KRTAP10-4	44573724	protein_coding	0		Gm19402	52 (a)
KRTAP10-5	44579455	protein_coding	0		Gm10318	57 (a)
KRTAP10-6	44591268	protein_coding	0		Gm3233	56 (a)
KRTAP10-7	44600597	protein_coding	0		N
KRTAP10-8	44612079	protein_coding	0.69623		Gm19668	63 (a)
KRTAP10-9	44627123	protein_coding	0.0258122		Gm3250	60 (a)
KRTAP10-10	44637356	protein_coding	0		Gm9507	57 (a)
KRTAP10-11	44646414	protein_coding	0		N
KRTAP12-4	44654213	protein_coding	0.0418742		N
KRTAP12-3	44657932	protein_coding	0		Gm10272	54 (a)
KRTAP12-2	44666189	protein_coding	0		Gm10100	77.5 (n)
IMMTP1	44675868	processed_pseudogene		0	N
KRTAP12-1	44681576	protein_coding	0		Gm10142	50 (a)
KRTAP12-6P	44686358	processed_pseudogene		0	N
KRTAP10-12	44697172	protein_coding	0		Gm7137	53 (a)
KRTAP10-13P	44702221	unprocessed_pseudogene		0	N
UBE2G2	44768580	protein_coding	22.0446		Ube2g2	89.49 (n)
LINC01424	44802577	antisense		0.308006	N
SUMO3	44805617	protein_coding	31.7186		Sumo3	90.94 (n)
PTTG1IP	44849585	protein_coding	20.2084		Pttg1ip	77.97 (n)
ITGB2	44885953	protein_coding	0.408782		Itgb2	80.65 (n)
ITGB2-AS1	44921051	antisense		0.0806858	N
AL844908.2(LL21NC02-1C16.1)	44929653	sense_intronic		1.05099	N
LINC01547	44932814	lincRNA		1.05306	N
AL844908.1	44936303	antisense		0	N
FAM207A	44940012	protein_coding	7.65307		Fam207a	79.69 (n)
AP001505.1	44978832	lincRNA		2.37992	N
LINC00163	44989864	lincRNA		0.0140865	N
LINC00165	44994362	lincRNA		0	N
PICSAR(LINC00162)	44999208	lincRNA		0.0913737	N
SSR4P1	45070952	transcribed_processed_pseudogene		0.03965	N
ADARB1	45073853	protein_coding	0.511529		Adarb1	87.73 (n)
AL133499.1	45100487	lincRNA		0	N
LINC00334	45234340	lincRNA		0.615081	N
POFUT2	45263928	protein_coding	19.0618		Pofut2	84.07 (n)
LINC00205	45288050	bidirectional_promoter_lncRNA		3.2069	N
BX322557.2	45299929	lincRNA		3.15243	N
LINC00315	45300245	lincRNA		0	N
BX322557.1	45336707	lincRNA		0	N
LINC00316	45338590	lincRNA		0	N
MTCO1P3	45376191	processed_pseudogene		0	N
BX322559.1	45378201	antisense		0	N
BX322562.1(LL21NC02-21A1.1)	45403809	lincRNA		0	N		Deletion D
COL18A1	45405137	protein_coding	0		Col18a1	75.59 (n)	Deletion D
COL18A1-AS2	45407386	antisense		0	N		Deletion D
COL18A1-AS1	45419716	antisense		0	N		Deletion D
MIR6815	45478266	miRNA		0	N		Deletion D
SLC19A1	45493572	protein_coding	0		Slc19a1	73.87 (n)	Deletion D
LINC01694(AL133493.2)	45593654	lincRNA		0.0128289	N		Deletion D
AL133493.1	45596364	lincRNA		0	N		Deletion D
PCBP3	45643694	protein_coding	0		Pcbp3	93.08 (n)	Deletion D
AL133492.1	45759804	antisense		0	N		Deletion D
AL592528.1	45827961	antisense		0	N		Deletion D
AJ011931.1	45870854	sense_intronic		0	N		Deletion D
AJ239328.1	45914296	sense_overlapping		0	N		Deletion D
AJ011932.1	45974489	lincRNA		0	N		Deletion D
COL6A1	45981737	protein_coding	0		Col6a1	83.15 (n)	Deletion D
AP001476.1	46037052	lincRNA		0	N		Deletion D
AP001476.3	46052596	lincRNA		0	N		Deletion D
AP001476.2	46056516	lincRNA		0	N		Deletion D
PSMA6P3	46072085	processed_pseudogene		0	N		Deletion D
AP001471.1	46093264	antisense		0	N		Deletion D
COL6A2	46098097	protein_coding	0.144449		Col6a2	85.38 (n)	Deletion D
FTCD	46136262	protein_coding	0		Ftcd	80.35 (n)	Deletion D
FTCD-AS1	46151614	antisense		0	N		Deletion D
SPATC1L	46161148	protein_coding	0		Spatc1l	82.1 (n)	Deletion D
AP001468.1	46185079	antisense		0	N		Deletion D
LSS	46188141	protein_coding	0		Lss	83.04 (n)	Deletion D
AP001469.1	46220269	antisense		0	N		Deletion D
MCM3AP-AS1	46229217	antisense		0.0479866	N		Deletion D
MCM3AP	46235133	protein_coding	13.3203		Mcm3ap	80.39 (n)	Deletion D
AP001469.2	46246890	antisense		0	N		Deletion D
AP001469.3	46251549	antisense		0	N		Deletion D
YBEY	46286342	protein_coding	2.27859		Ybey	82.32 (n)
C21orf58	46300181	protein_coding	2.52359		2610028H24Rik
PCNT	46324141	protein_coding	10.8025		Pcnt	75.69 (n)
RPL18AP2	46420553	processed_pseudogene		0	N
DIP2A	46458891	protein_coding	33.4089		Dip2a	87 (n)
DIP2A-IT1	46462471	sense_intronic		0	N
RNU6-396P	46525618	snRNA		0	N
S100B	46598604	protein_coding	16.3764		S100b	85.51 (n)
PRMT2	46635595	protein_coding	60.2429		Prmt2	83.76 (n)
DSTNP1	46653558	processed_pseudogene		6.53895	N
RPL23AP4	46690764	processed_pseudogene		0	N

## Sheet: Figure 2–Data 1B MiRNA FPKM 
Gene name	Gene start (bp)	HSA21 miRNA in TcMAC21(FPKM)	MiRNA mouse othologs ?	miRNA mouse othologs in TcMAC21 (FPKM)	Similarity	Note
MIR3156-3	13406384	0	N	N
MIR3118-1	13644775	0	N	N
MIR8069-2	13724189	0	N	N
MIR99A	16539089	0	Mir99a(MMU16)	0	97 (a)
MIRLET7C	16539828	0	Mirlet7c-1(MMU16)	0	70 (a)
MIR125B2	16590237	0	Mir125b-2(MMU16)	0.190286	97 (a)
MIR548X	18686090	0	N	N		Deletion B
MIR6130	23079284	0	N	N		Deletion B
MIR155	25573980	0.0380404	N	N
MIR4759	26953961	0	N	N		Deletion C
MIR4327	30375294	0	N	N
MIR6501	33550662	0	N	N
MIR802	35720715	0	Mir802(MMU16)		85 (a)
MIR6508	39447010	0	N	N
MIR4760	40212352	0	N	N
MIR3197	41167557	0	N	N
MIR6814	41746772	0	N	N
MIR5692B	42950928	0	N	N
MIR6070	43609887	0	N	N
MIR6815	45478266	0	N	N		Deletion D

## Sheet: Figure 2–Data 1C FPKM of PCG
Gene name(verified list)	Gene start (bp)	Gene end (bp)	Karyotype band	Mouse ortholog	Similarity (between mouse and human)	Location on mouse chromosome	Eu(HSA21 PCG, FPKM)	MAC21(HSA21 PCG, FPKM)	Eu(HSA21 mouse ortholog, FPKM)	MAC21(HSA21 mouse ortholog, FPKM)	Note
POTED	13609858	13641585	q11.2	None			0	2.41971	N	N
LIPI	14108813	14210891	q11.2	Lipi	75.98 (n)	16	0	0.0638204	0	0.0211064
RBM11	14216130	14228372	q11.2	Rbm11	82.97 (n)	16	0	1.46976	1.77231	1.96388
HSPA13	14371115	14383484	q11.2	Hspa13	86.55 (n)	16	0	9.84258	12.7905	13.3927
SAMSN1	14485228	14583402	q11.2	Samsn1	83.19 (n)	16	0	0.116297	0.431788	0.461651
NRIP1	14961235	15065936	q21.1	Nrip1	83.12 (n)	16	0	0	8.14529	8.45789	deletion A
USP25	15730025	15880069	q21.1	Usp25	86.9 (n)	16	0	0	4.08162	4.50271	deletion A
CXADR	17512382	17593579	q21.1	Cxadr	83.56 (n)	16	0	16.2996	84.9885	82.3576
BTG3	17593653	17612947	q21.1	Btg3	91.4 (n)	16	0	7.36962	3.67448	3.36549
C21orf91	17788967	17819386	q21.1	D16Ertd472e	83.97 (n)	16	0	0.400897	2.01774	2.22526
CHODL	17901263	18267373	q21.1	Chodl	87.67 (n)	16	0	0	1.83581	2.20986	deletion B
TMPRSS15	18269116	18485879	q21.1	mprss	80.21 (n)	16	0	0	0.0907459	0.0500387	deletion B
NCAM2	20998315	21543329	q21.1	Ncam2	86.85 (n)	16	0	0	6.31373	6.97813	deletion B
MRPL39	25585656	25607517	q21.3	Mrpl39	84.7 (n)	16	0	4.50746	8.83678	9.12839
JAM2	25639272	25717562	q21.3	Jam2	83.45 (n)	16	0.0137488	2.75162	5.92	6.85729
ATP5J(ATP5PF)	25716503	25735673	q21.3	Atp5j	88.27 (n)	16	0	59.5415	185.142	182.995
GABPA	25734570	25772460	q21.3	Gabpa	89.7 (n)	16	0	3.67876	9.11873	9.49885
APP	25880550	26171128	q21.3	App	89.36 (n)	16	0.0446956	211.048	216.581	225.266
CYYR1	26466209	26573284	q21.3	Cyyr1	82.25 (n)	16	0	1.24778	0.995447	0.985583
ADAMTS1	26835747	26845409	q21.3	Adamts1	81.04 (n)	16	0	0.361715	2.3705	2.59141
ADAMTS5	26917912	26966513	q21.3	Adamts5	85.86 (n)	16	0	0	0.384991	0.618383	deletion C
N6AMT1	28872191	28885371	q21.3	N6amt1	84.11 (n)	16	0	3.20163	9.83101	10.1127
LTN1	28928144	28992956	q21.3	Ltn1	83.97 (n)	16	0	6.04537	8.00445	7.83264
RWDD2B	29004384	29019378	q21.3	Rwdd2b	84.83 (n)	16	0	4.13483	5.13885	5.35866
USP16	29024629	29054488	q21.3	Usp16	84.94 (n)	16	0	8.58814	32.954	34.8736
CCT8	29055805	29073797	q21.3	Cct8	88.63 (n)	16	0	37.3608	120.764	118.548
MAP3K7CL	29077471	29175889	q21.3	Map3k7cl	77 (a)	16	0	4.65911	0.190562	0.147561
BACH1	29194071	29630751	q21.3	Bach1	79.68 (n)	16	0	3.48748	10.8964	10.2036
GRIK1	29536933	29940033	q21.3	Grik1	90.71 (n)	16	0.013134	4.28641	8.64084	10.196
CLDN17	30165564	30166756	q21.3	Cldn17	81.4 (n)	16	0	0	0	0.0268543
CLDN8	30214006	30216073	q22.11	Cldn8	82.96 (n)	16	0	0	0	0
KRTAP24-1	30281309	30282958	q22.11	Krtap24-1	70.7 (n)	16	0	0	0	0
KRTAP25-1	30289145	30289514	q22.11	None		16	0	0	0	0
KRTAP26-1	30319124	30320316	q22.11	Krtap26-1	69.68 (n)	16	0	0	0	0
KRTAP27-1	30337013	30337694	q22.11	Krtap27-1	70.79 (n)	16	0	0	0	0
KRTAP23-1	30348399	30348609	q22.11	None		16	0	0	0	0
KRTAP13-2	30371391	30372257	q22.11	Krtap13-1	63 (a)	16	0	0	0	0
KRTAP13-1	30396074	30396822	q22.11	Krtap13-1	76.71 (n)	16	0	0	0	0
KRTAP13-3	30425265	30425968	q22.11	Krtap13	48 (a)	16	0	0	0	0
KRTAP13-4	30430230	30431026	q22.11	4930553J12Rik	46 (a)	16	0	0	0	0
KRTAP15-1	30440275	30440945	q22.11	Krtap15	71.08 (n)	16	0	0	0	0
KRTAP19-1	30479699	30480344	q22.11	None		16	0	0	0	0
KRTAP19-2	30487057	30487436	q22.11	None		16	0	0	0	0
KRTAP19-3	30491464	30491985	q22.11	None		16	0	0	0	0
KRTAP19-4	30496824	30497133	q22.11	None		16	0	0	0	0
KRTAP19-5	30501657	30502117	q22.11	None		16	0	0	0	0
KRTAP19-6	30541535	30541864	q22.11	None		16	0	0	0	0
KRTAP19-7	30560875	30561314	q22.11	None		16	0	0	0	0
KRTAP22-2	30590105	30590397	q22.11	None		16	0	0	0	0
KRTAP6-3	30592440	30593075	q22.11	None		16	0	0	0	0
KRTAP6-2	30598590	30598902	q22.11	None		16	0	0	0	0
KRTAP22-1	30601087	30601382	q22.11	None		16	0	0	0	0
KRTAP6-1	30613431	30613930	q22.11	None		16	0	0	0	0
KRTAP20-1	30616425	30616699	q22.11	None		16	0	0	0	0
KRTAP20-4	30620627	30620850	q22.11	None		16	0	0	0	0
KRTAP20-2	30635236	30635619	q22.11	None		16	0	0	0	0
KRTAP20-3	30642864	30643136	q22.11	None		16	0	0	0	0
KRTAP21-3	30718525	30718777	q22.11	None		16	0	0	0	0
KRTAP21-2	30746794	30747233	q22.11	None		16	0	0	0	0
KRTAP21-1	30754830	30755428	q22.11	None		16	0	0	0	0
KRTAP8-1	30812697	30813252	q22.11	Krtap8-1	84 (a)	16	0	0	0	0
KRTAP7-1	30829039	30829759	q22.11	Krtap7-1	82.95 (n)	16	0	0	0	0
KRTAP11-1	30880644	30881555	q22.11	Krtap11-1	82.82 (n)	16	0	0	0	0
KRTAP19-8	31038159	31038476	q22.11	None		16	0	0	0	0
TIAM1	31118416	31559977	q22.11	Tiam1	89.38 (n)	16	0	6.33115	12.0605	11.2349
SOD1	31659622	31668931	q22.11	Sod1	83.77 (n)	16	0.0351572	98.8571	257.865	263.338
SCAF4	31671033	31732075	q22.11	Scaf4	88.3 (n)	16	0	6.82538	11.1157	10.4029
HUNK	31873315	32044633	q22.11	Hunk	87.35 (n)	16	0	5.04	9.0021	7.93823
MIS18A	32268219	32279069	q22.11	Mis18a	80.07 (n)	16	0	2.8221	8.3013	7.70046
MRAP	32291813	32314784	q22.11	Mrap	79.77 (n)	16	0	0.0368081	0.16012	0.275604
URB1	32311018	32393026	q22.11	Urb1	79.31 (n)	16	0	4.58655	4.5031	4.5091
EVA1C	32412006	32515397	q22.11	Eva1c	85.76 (n)	16	0	2.96892	0.860492	0.722168
TCP10L	32574841	32587373	q22.11	None		16	0	20.0423	N	N	RNA-seq readthough
C21orf59(CFAP298)	32592079	32612866	q22.11	1110004E09Rik	84.37 (n)	16	0	20.0423	21.1363	20.0423
SYNJ1	32628759	32728048	q22.11	Synj1	86.97 (n)	16	0.0567385	10.7838	37.0265	36.0915
PAXBP1	32733899	32771858	q22.11	Paxbp1	89.79 (n)	16	0	12.4431	45.8587	48.532
C21orf62	32793564	32813743	q22.11	4932438H23Rik	79.4 (n)	16	0	0.351459	0.275867	0.217765
OLIG2	33025845	33029196	q22.11	Olig2	88.13 (n)	16	0	2.42165	9.03751	7.82321
OLIG1	33070144	33072420	q22.11	Olig1	84.56 (n)	16	0	8.2055	25.8971	23.7329
IFNAR2	33229901	33265675	q22.11	Ifnar2	64.91 (n)	16	0	7.82719	11.6232	13.6467	RNA-seq readthough
AP000295.1	33246774	33283212	q22.11	Il10rb	42 (a)	16	0	7.82719	11.6232	13.6467
IL10RB	33266358	33310187	q22.11	Il10rb	76.65 (n)	16	0	7.82719	11.6232	13.6467
IFNAR1	33324477	33359862	q22.11	Ifnar1	66.05 (n)	16	0	4.71079	24.5202	24.1621
IFNGR2	33402896	33479348	q22.11	Ifngr2	68.87 (n)	16	0	13.4129	39.9403	37.4209
TMEM50B	33432485	33480011	q22.11	Tmem50b	87.9 (n)	16	0	11.3277	32.0019	32.9299
DNAJC28	33485530	33491720	q22.11	Dnajc28	78.57 (n)	16	0	1.29672	0.929772	0.747287
GART	33503931	33543491	q22.11	Gart	83.2 (n)	16	0	19.4637	15.4625	15.44
SON	33542618	33577481	q22.11	Son	87.54 (n)	16	1.77202	39.1344	122.032	172.386
DONSON	33559542	33588708	q22.11	Donson	80 (n)	16	0.132945	126.81	257.57	251.285	RNA-seq readthough
ATP5O	33903453	33915980	q22.11	Atp5o	79.81 (n)	16	0.132945	126.81	257.57	251.285
CRYZL1	33589341	33643926	q22.11	Cryzl1	88.79 (n)	16	0	24.6556	38.6478	39.4765
ITSN1	33642400	33899861	q22.11	Itsn1	88.16 (n)	16	0	25.0076	44.2919	39.0867
AP000311.1	33584687	33931607	q22.11	Atp5o	38 (a)	16	didn't find	didn't find	didn't find	didn't find
SLC5A3	34073570	34106262	q22.11	Slc5a3	90.71 (n)	16	0	28.2479	35.1575	34.686	RNA-seq readthough
MRPS6	34073224	34143034	q22.11	Mrps6	84 (n)	16	0	28.2479	35.1575	34.686
KCNE2	34364024	34371389	q22.11	Kcne2	82.66 (n)	16	0	0.57189	1.59149	2.31638
C21orf140(FAM243A)	34400317	34401072	q22.12	4930563D23Rik	78.35 (n)	16	0	0	0.167122	0.20938
SMIM11(SMIM11A)	34375480	34407866	q22.11	Smim11	84 (a)	16	0	0.9772	13.8464	14.3167
AP000322.1(SMIM34A)	34418715	34423966	q22.12	None		16	didn't find	didn't find	didn't find	didn't find
KCNE1	34446688	34512275	q22.12	Kcne1	76 (a)	16	0	0.076437	0	0.0573238
RCAN1	34513142	34615142	q22.12	Rcan1	87.28 (n)	16	0	0.193183	27.8418	26.8315
CLIC6	34669389	34718227	q22.12	Clic6	74.14 (n)	16	0	3.49691	1.47623	2.28558
RUNX1	34787801	36004667	q22.12	Runx1	91.47 (n)	16	0	2.34434	0.150119	0.175856
CBR1	36069941	36073166	q22.12	Cbr1	83.87 (n)	16	0	15.8982	33.9047	35.1142
SETD4	36034541	36079389	q22.12	Setd4	78.28 (n)	16	0	11.61	6.18899	6.74725
CBR3	36134912	36146566	q22.12	Cbr3	83.75 (n)	16	0	0	2.20512	2.51308
DOPEY2(DOP1B)	36156782	36294274	q22.12	Dopey2	83.1 (n)	16	0	0.0613286	13.4583	12.6229
MORC3	36320189	36386148	q22.12	Morc3	82.82 (n)	16	0	3.09363	11.1109	10.6911	RNA-seq readthough
CHAF1B	36385378	36419015	q22.12	Chaf1b	81.84 (n)	16	0	3.09363	6.53334	6.63
CLDN14	36460621	36576569	q22.13	Cldn14	86.47 (n)	16	0	0.0831617	0.0875076	0.0644181
SIM2	36699133	36749917	q22.13	Sim2	88.31 (n)	16	0	0.737634	0.0232674	0.0236958
HLCS	36750888	36990236	q22.13	Hlcs	78.59 (n)	16	0	4.40028	2.21141	2.47137
RIPPLY3	37006150	37019659	q22.13	Ripply3	68.28 (n)	16	0	0.0791828	0.228198	0.319656
PIGP	37059170	37073170	q22.13	Pigp	86.87 (n)	16	0	6.89456	30.8241	28.6662
TTC3	37073226	37203112	q22.13	Ttc3	82.23 (n)	16	0	87.9523	259.649	244.034
DSCR3(VPS26C)	37223420	37267919	q22.13	Dscr3	85.25 (n)	16	0	15.2806	24.7426	25.0118
DYRK1A	37365790	37517450	q22.13	Dyrk1a	93.93 (n)	16	0.00558786	17.5915	23.6118	23.5135
KCNJ6	37607376	37916446	q22.13	Kcnj6	90.23 (n)	16	0	1.06518	2.07336	2.08773
KCNJ15	38157034	38307357	q22.13	Kcnj15	85.78 (n)	16	0	0	0.0299033	0.125251
ERG	38380027	38661780	q22.2	Erg	89.85 (n)	16	0	0.36729	2.82167	2.21647
ETS2	38805307	38824955	q22.2	Ets2	85.94 (n)	16	0	4.25749	9.60998	9.57314
PSMG1	39174769	39183851	q22.2	Psmg1	80.9 (n	16	0	15.6183	61.3305	57.8396	RNA-seq readthough
BRWD1	39184176	39321559	q22.2	Brwd1	81.6 (n)	16	0	25.6729	61.3305	57.8396
HMGN1	39342315	39349647	q22.2	Hmgn1	81.05 (n)	16	0.0721298	70.3674	72.0593	72.2519
WRB	39380244	39428528	q22.2	Wrb	86.21 (n)	16	0	30.0914	27.3512	27.6271
LCA5L	39405844	39445805	q22.2	Lca5l	70.76 (n)	16	0	2.3938	1.35315	1.32244
SH3BGR	39445855	39515506	q22.2	Sh3bgr	88(n)	16	0	6.92035	0.907539	1.64923
B3GALT5	39556442	39673137	q22.2	B3galt5	74.27 (n)	16	0	0.325928	1.19991	1.59759
IGSF5	39745407	39802096	q22.2	Igsf5	66 (n)	16	0	0.136356	58.7122	60.2461	RNA-seq readthough
PCP4	39867317	39929397	q22.2	Pcp4	89.25 (n)	16	0	25.9889	58.7122	60.2461
DSCAM	40010999	40847139	q22.2	Dscam	90.11 (n)	16	0	3.06501	8.57138	9.27568
BACE2	41167801	41282518	q22.2	Bace2	84.58 (n)	16	0	3.39481	0.560984	0.733361
FAM3B	41304212	41357431	q22.3	Fam3b	79.02 (n)	16	0	0.958917	0	0
MX2	41361943	41409390	q22.3	MX2	78(n)	16	0	4.29703	0.224353	0.325565
MX1	41420304	41459214	q22.3	Mx1	69 (a)	16	0	1.73429	0.0291468	0.0549063
TMPRSS2	41464551	41531116	q22.3	Tmprss2	77.64 (n)	16	0	0.483407	0.00741972	0.0650048
RIPK4	41739369	41767106	q22.3	Ripk4	84.91 (n)	16	0	0	0.478622	0.438219
PRDM15	41798225	41879482	q22.3	Prdm15	85.32 (n)	16	0	3.38301	7.19298	5.23082
C2CD2	41885112	41953890	q22.3	C2cd2	76.6 (n)	16	0	9.60761	3.55001	3.36831
ZBTB21	41986831	42010387	q22.3	Zbtb21	83.04 (n	16	0	1.69286	3.02071	2.45032
UMODL1	42062959	42143453	q22.3	Umodl1	72.96 (n)	17	0	0.011196	0.0111992	0.0497179
ABCG1	42199689	42297244	q22.3	Abcg1	87.69 (n)	17	0	1.302	2.95725	2.7634
TFF3	42311667	42315651	q22.3	Tff3	74.58 (n)	17	0	0.183236	0	0
TFF2	42346357	42351128	q22.3	Tff2	83.33 (n)	17	0	0.127666	0	0
TFF1	42362282	42366594	q22.3	Tff1	71.6 (n	17	0	0	0	0
TMPRSS3	42371890	42396846	q22.3	Tmprss3	84.55 (n)	17	0	0	0.017264	0.0107282
UBASH3A	42403447	42447681	q22.3	Ubash3a	81.86 (n)	17	0	0	0.00890421	0.0224832
RSPH1	42472486	42496354	q22.3	Rsph1	80.27 (n)	17	0	3.11871	3.80567	3.84483
SLC37A1	42496008	42581440	q22.3	Slc37a1	83.24 (n)	17	0	6.23685	3.36813	3.3518
PDE9A	42653636	42775509	q22.3	Pde9a	87.4 (n)	17	0	2.18472	37.5082	31.7553
WDR4	42843094	42879568	q22.3	Wdr4	79.92 (n)	17	0	5.31804	20.1122	18.7865
NDUFV3	42879644	42913304	q22.3	Ndufv3	65.87 (n)	17	0	7.88858	102.881	103.468
PKNOX1	42974510	43033931	q22.3	Pknox1	87.61 (n)	17	0	2.87769	9.06017	7.56982
CBS	43053191	43076943	q22.3	Cbs	82.66 (n)	17	0	30.138	9.98579	10.1743
U2AF1	43092956	43107587	q22.3	U2af1	90(n)	17	0.208775	4.19253	76.4965	71.3065
CRYAA	43169008	43172805	q22.3	Cryaa	88.44 (n)	17	0	0.055426	0.0980801	0.131498
SIK1	43414515	43427128	q22.3	sik1	80(n)	17	0	0	7.80134	8.24173
H2BFS	43565189	43565648	q22.3	None			0	0.0806959	N	N
HSF2BP	43529192	43659493	q22.3	Hsf2bp	88.36 (n)	17	0	1.201	0.939219	0.843588
RRP1B	43659548	43696079	q22.3	Rrp1b	74.65 (n)	17	0	7.24296	13.6176	12.5713
PDXK	43719094	43762307	q22.3	Pdxk	84.72 (n)	10	0	24.5337	10.3336	11.4902
CSTB	43772511	43776445	q22.3	Cstb	77.21 (n)	10	0	11.9492	28.556	30.4021
RRP1	43789513	43805293	q22.3	Rrp1	58 (a)	10	0	21.2896	127.007	120.123
AGPAT3	43865186	43986536	q22.3	Agpat3	86.08 (n)	10	0	5.16267	45.6483	49.3714
TRAPPC10	44012319	44106552	q22.3	Trappc	84.95 (n)	10	0	11.2222	24.4432	24.0789
PWP2	44107290	44131181	q22.3	Pwp2	89 (a)	10	0	1.41846	12.2384	11.1014
C21orf33(GATD3A)	44133605	44145723	q22.3	D10Jhu81e	83.08 (n)	10	0	3.697	18.8551	20.5555
ICOSLG	44222991	44240966	q22.3	Icosl	61.58 (n)	10	0	0.0777412	0.347414	0.363389
DNMT3L	44246339	44262216	q22.3	Dnmt3l	71.63 (n)	10	0	0	0.0300051	0
AIRE	44285838	44298648	q22.3	Aire	76.74 (n)	10	0	0.0751814	0.120099	0.0978002
PFKL	44300051	44327376	q22.3	Pfkl	87.22 (n)	10	0	11.3667	25.1507	26.5261
C21orf2(CFAP410)	44328944	44339402	q22.3	1810043G02Rik	79.38 (n)	10	0	1.60983	16.6563	15.5253
TRPM2	44350163	44443081	q22.3	Trpm2	83.5 (n)	10	0	8.00382	3.36179	4.39875
LRRC3	44455486	44462196	q22.3	Lrrc3	79.64 (n)	10	0	2.87739	11.612	10.9662
KRTAP10-1	44538981	44540195	q22.3	Gm7138	58 (a)	10	0	0.0258122	N	N
KRTAP10-2	44550357	44551505	q22.3	Gm3250	57 (a)	10	0	0	N	N
KRTAP10-3	44557790	44558760	q22.3	Gm3238	55 (a)	10	0	0	N	N
KRTAP10-5	44579455	44580604	q22.3	Gm10318	57 (a)	10	0	0	N	N
KRTAP10-6	44591268	44592505	q22.3	Gm3233	56 (a)	10	0	0	N	N
KRTAP10-7	44600597	44602174	q22.3	Krtap10-10	80.82 (n)	10	0	0	N	N
KRTAP10-8	44612079	44612954	q22.3	Gm19668	63 (a)	10	0	0	N	N
KRTAP10-9	44627123	44628293	q22.3	Gm3250	60 (a)	10	0	0	N	N
KRTAP10-4	44573724	44638284	q22.3	Gm19402	52 (a)	10	0	0	0	0
KRTAP10-10	44637356	44638455	q22.3	Gm9507	57 (a)	10	0	0	N	N
KRTAP10-11	44646414	44647650	q22.3	Krtap10-10	56 (a)	10	0	0	N	N
KRTAP12-4	44654213	44654659	q22.3	None		10	0	0	N	N
KRTAP12-3	44657932	44658341	q22.3	Gm10272	54 (a)	10	0	0	N	N
KRTAP12-2	44666189	44666927	q22.3	Gm10272	54 (a)	10	0	0	N	N
KRTAP12-1	44681576	44682163	q22.3	LOC101056229	74.04 (n)	10	0	0	0	0
KRTAP10-12	44697172	44698044	q22.3	Gm7137	53 (a)	10	0	0	N	N
TSPEAR	44497892	44711580	q22.3	Tspear	81.79 (n)	10	0	2.67	0.139799	0.138148
UBE2G2	44768580	44802019	q22.3	Ube2g2	89.49 (n)	10	0	22.0446	158.859	158.211	RNA-seq readthough
SUMO3	44805617	44818779	q22.3	Sumo3	90.94 (n)	10	0.0185075	31.7186	158.859	158.211
PTTG1IP	44849585	44873903	q22.3	Pttg1ip	77.97 (n)	10	0	20.2084	21.652	23.0617
ITGB2	44885953	44931989	q22.3	Itgb2	80.98 (n)	10	0	0.408782	0.323542	0.378309
FAM207A	44940010	44976989	q22.3	Fam207a	79.69 (n)	10	0	7.65307	8.42304	8.04911
ADARB1	45073853	45226560	q22.3	Adarb1	87.73 (n)	10	0	0.511529	18.0394	19.8897
POFUT2	45263928	45287898	q22.3	Pofut2	84.07 (n	10	0	19.0618	9.31953	10.0212
COL18A1	45405137	45513720	q22.3	Col18a1	75.59 (n)	10	0	0	6.48156	7.00659	deletion D
SLC19A1	45493572	45544411	q22.3	Slc19a1	73.87 (n)	10	0	0	15.736	15.6459	deletion D
PCBP3	45643694	45942454	q22.3	Pcbp3	93.08 (n)	10	0	0	20.3467	30.3115	deletion D
COL6A1	45981737	46005050	q22.3	Col6a1	83.15 (n)	10	0	0	10.1865	13.5372	deletion D
COL6A2	46098097	46132849	q22.3	Col6a2	85.38 (n)	10	0	0.144449	6.21044	8.96354	deletion D
FTCD	46136262	46155567	q22.3	Ftcd	80.35 (n)	10	0	0	0.0656423	0.156667	deletion D
SPATC1L	46161148	46184476	q22.3	Spatc1l	82.1 (n)	10	0	0	0.0502232	0.0300092	deletion D
LSS	46188141	46228824	q22.3	Lss	83.04 (n)	10	0	0	26.4025	25.3935	deletion D
MCM3AP	46235126	46286297	q22.3	Mcm3ap	80.39 (n)	10	0	13.3203	14.3199	13.8148
YBEY	46286337	46297751	q22.3	Ybey	82.32 (n)	10	0	2.27859	0.88817	0.936937
C21orf58	46300181	46323875	q22.3	2610028H24Rik	49 (a)	10	0	2.52359	0	0.0207837
PCNT	46324122	46445769	q22.3	Pcnt	61 (a) or75 (n)	10	0	10.8025	4.49371	3.84221
DIP2A	46458899	46569852	q22.3	Dip2a	87 (n)	10	0	33.4089	27.0201	24.9722
S100B	46598962	46605208	q22.3	S100b	85.51 (n)	10	0	16.3764	1.19	2.59793
PRMT2	46635595	46665124	q22.3	Prmt2	83.76 (n)	10	0	60.2429	74.0751	73.1433

## Sheet: Figure 2–Data 1D FPKM>=1
Gene name(verified list)	Gene start (bp)	Gene end (bp)	Karyotype band	Mouse ortholog	Similarity (between mouse and human)	Location on mouse chromosome	Eu(HSA21 PCG, FPKM)	MAC21(HSA21 PCG, FPKM)	Eu(HSA21 mouse ortholog, FPKM)	MAC21(HSA21 mouse ortholog, FPKM)	Note	HSA21 orthologs ratio (MAC21/Eu)	MAC21(HSA21)/Eu(HSA21 rat orthologs)	MAC21 (HSA21+ orthologs)/Eu(HSA21 orthologs)
RBM11	14216130	14228372	q11.2	Rbm11	82.97 (n)	16	0	1.46976	1.77231	1.96388		1.10809	0.829291	1.93738
HSPA13	14371115	14383484	q11.2	Hspa13	86.55 (n)	16	0	9.84258	12.7905	13.3927		1.04708	0.769523	1.8166
NRIP1	14961235	15065936	q21.1	Nrip1	83.12 (n)	16	0	0	8.14529	8.45789	deletion A	1.03838	0	1.03838
USP25	15730025	15880069	q21.1	Usp25	86.9 (n)	16	0	0	4.08162	4.50271	deletion A	1.10317	0	1.10317
CXADR	17512382	17593579	q21.1	Cxadr	83.56 (n)	16	0	16.2996	84.9885	82.3576		0.969044	0.191786	1.16083
BTG3	17593653	17612947	q21.1	Btg3	91.4 (n)	16	0	7.36962	3.67448	3.36549		0.915909	2.00562	2.92153
C21orf91	17788967	17819386	q21.1	D16Ertd472e	83.97 (n)	16	0	0.400897	2.01774	2.22526		1.10285	0.198686	1.30153
CHODL	17901263	18267373	q21.1	Chodl	87.67 (n)	16	0	0	1.83581	2.20986	deletion B	1.20375	0	1.20375
NCAM2	20998315	21543329	q21.1	Ncam2	86.85 (n)	16	0	0	6.31373	6.97813	deletion B	1.10523	0	1.10523
MRPL39	25585656	25607517	q21.3	Mrpl39	84.7 (n)	16	0	4.50746	8.83678	9.12839		1.033	0.510079	1.54308
JAM2	25639272	25717562	q21.3	Jam2	83.45 (n)	16	0.0137488	2.75162	5.92	6.85729		1.15833	0.464801	1.62313
ATP5J(ATP5PF)	25716503	25735673	q21.3	Atp5j	88.27 (n)	16	0	59.5415	185.142	182.995		0.988403	0.321599	1.31
GABPA	25734570	25772460	q21.3	Gabpa	89.7 (n)	16	0	3.67876	9.11873	9.49885		1.04169	0.403429	1.44511
APP	25880550	26171128	q21.3	App	89.36 (n)	16	0.0446956	211.048	216.581	225.266		1.0401	0.974453	2.01455
CYYR1	26466209	26573284	q21.3	Cyyr1	82.25 (n)	16	0	1.24778	0.995447	0.985583		0.990091	1.25349	2.24358
ADAMTS1	26835747	26845409	q21.3	Adamts1	81.04 (n)	16	0	0.361715	2.3705	2.59141		1.09319	0.15259	1.24578
N6AMT1	28872191	28885371	q21.3	N6amt1	84.11 (n)	16	0	3.20163	9.83101	10.1127		1.02865	0.325666	1.35432
LTN1	28928144	28992956	q21.3	Ltn1	83.97 (n)	16	0	6.04537	8.00445	7.83264		0.978536	0.755251	1.73379
RWDD2B	29004384	29019378	q21.3	Rwdd2b	84.83 (n)	16	0	4.13483	5.13885	5.35866		1.04277	0.804622	1.8474
USP16	29024629	29054488	q21.3	Usp16	84.94 (n)	16	0	8.58814	32.954	34.8736		1.05825	0.26061	1.31886
CCT8	29055805	29073797	q21.3	Cct8	88.63 (n)	16	0	37.3608	120.764	118.548		0.98165	0.30937	1.29102
BACH1	29194071	29630751	q21.3	Bach1	79.68 (n)	16	0	3.48748	10.8964	10.2036		0.936419	0.320058	1.25648
GRIK1	29536933	29940033	q21.3	Grik1	90.71 (n)	16	0.013134	4.28641	8.64084	10.196		1.17998	0.496064	1.67604
TIAM1	31118416	31559977	q22.11	Tiam1	89.38 (n)	16	0	6.33115	12.0605	11.2349		0.931545	0.524949	1.45649
SOD1	31659622	31668931	q22.11	Sod1	83.77 (n)	16	0.0351572	98.8571	257.865	263.338		1.02122	0.383368	1.40459
SCAF4	31671033	31732075	q22.11	Scaf4	88.3 (n)	16	0	6.82538	11.1157	10.4029		0.935874	0.614031	1.54991
HUNK	31873315	32044633	q22.11	Hunk	87.35 (n)	16	0	5.04	9.0021	7.93823		0.88182	0.559869	1.44169
MIS18A	32268219	32279069	q22.11	Mis18a	80.07 (n)	16	0	2.8221	8.3013	7.70046		0.927621	0.339959	1.26758
URB1	32311018	32393026	q22.11	Urb1	79.31 (n)	16	0	4.58655	4.5031	4.5091		1.00133	1.01853	2.01986
C21orf59(CFAP298)	32592079	32612866	q22.11	1110004E09Rik	84.37 (n)	16	0	20.0423	21.1363	20.0423		0.948241	0.948241	1.89648
SYNJ1	32628759	32728048	q22.11	Synj1	86.97 (n)	16	0.0567385	10.7838	37.0265	36.0915		0.974748	0.291245	1.26599
PAXBP1	32733899	32771858	q22.11	Paxbp1	89.79 (n)	16	0	12.4431	45.8587	48.532		1.05829	0.271336	1.32963
OLIG2	33025845	33029196	q22.11	Olig2	88.13 (n)	16	0	2.42165	9.03751	7.82321		0.865638	0.267955	1.13359
OLIG1	33070144	33072420	q22.11	Olig1	84.56 (n)	16	0	8.2055	25.8971	23.7329		0.916431	0.31685	1.23328
IFNAR2	33229901	33265675	q22.11	Ifnar2	64.91 (n)	16	0	7.82719	11.6232	13.6467	RNA-seq readthough	1.17409	0.673411	1.8475
AP000295.1	33246774	33283212	q22.11	Il10rb	42 (a)	16	0	7.82719	11.6232	13.6467		1.17409	0.673411	1.8475
IL10RB	33266358	33310187	q22.11	Il10rb	76.65 (n)	16	0	7.82719	11.6232	13.6467		1.17409	0.673411	1.8475
IFNAR1	33324477	33359862	q22.11	Ifnar1	66.05 (n)	16	0	4.71079	24.5202	24.1621		0.985396	0.192119	1.17751
IFNGR2	33402896	33479348	q22.11	Ifngr2	68.87 (n)	16	0	13.4129	39.9403	37.4209		0.936921	0.335824	1.27274
TMEM50B	33432485	33480011	q22.11	Tmem50b	87.9 (n)	16	0	11.3277	32.0019	32.9299		1.029	0.35397	1.38297
GART	33503931	33543491	q22.11	Gart	83.2 (n)	16	0	19.4637	15.4625	15.44		0.998545	1.25877	2.25731
SON	33542618	33577481	q22.11	Son	87.54 (n)	16	1.77202	39.1344	122.032	172.386		1.41263	0.32069	1.73332
DONSON	33559542	33588708	q22.11	Donson	80 (n)	16	0.132945	126.81	257.57	251.285	RNA-seq readthough	0.975599	0.492332	1.46793
ATP5O	33903453	33915980	q22.11	Atp5o	79.81 (n)	16	0.132945	126.81	257.57	251.285		0.975599	0.492332	1.46793
CRYZL1	33589341	33643926	q22.11	Cryzl1	88.79 (n)	16	0	24.6556	38.6478	39.4765		1.02144	0.637956	1.6594
ITSN1	33642400	33899861	q22.11	Itsn1	88.16 (n)	16	0	25.0076	44.2919	39.0867		0.88248	0.564609	1.44709
SLC5A3	34073570	34106262	q22.11	Slc5a3	90.71 (n)	16	0	28.2479	35.1575	34.686	RNA-seq readthough	0.986589	0.803467	1.79006
MRPS6	34073224	34143034	q22.11	Mrps6	84 (n)	16	0	28.2479	35.1575	34.686		0.986589	0.803467	1.79006
KCNE2	34364024	34371389	q22.11	Kcne2	82.66 (n)	16	0	0.57189	1.59149	2.31638		1.45548	0.359343	1.81482
SMIM11(SMIM11A)	34375480	34407866	q22.11	Smim11	84 (a)	16	0	0.9772	13.8464	14.3167		1.03397	0.0705743	1.10454
RCAN1	34513142	34615142	q22.12	Rcan1	87.28 (n)	16	0	0.193183	27.8418	26.8315		0.963713	0.0069386	0.970651
CLIC6	34669389	34718227	q22.12	Clic6	74.14 (n)	16	0	3.49691	1.47623	2.28558		1.54825	2.36881	3.91707
CBR1	36069941	36073166	q22.12	Cbr1	83.87 (n)	16	0	15.8982	33.9047	35.1142		1.03567	0.468908	1.50458
SETD4	36034541	36079389	q22.12	Setd4	78.28 (n)	16	0	11.61	6.18899	6.74725		1.0902	1.87591	2.96611
CBR3	36134912	36146566	q22.12	Cbr3	83.75 (n)	16	0	0	2.20512	2.51308		1.13966	0	1.13966
DOPEY2(DOP1B)	36156782	36294274	q22.12	Dopey2	83.1 (n)	16	0	0.0613286	13.4583	12.6229		0.937927	0.00455694	0.942484
MORC3	36320189	36386148	q22.12	Morc3	82.82 (n)	16	0	3.09363	11.1109	10.6911	RNA-seq readthough	0.962217	0.278432	1.24065
CHAF1B	36385378	36419015	q22.12	Chaf1b	81.84 (n)	16	0	3.09363	6.53334	6.63		1.01479	0.473514	1.48831
HLCS	36750888	36990236	q22.13	Hlcs	78.59 (n)	16	0	4.40028	2.21141	2.47137		1.11755	1.98981	3.10736
PIGP	37059170	37073170	q22.13	Pigp	86.87 (n)	16	0	6.89456	30.8241	28.6662		0.929993	0.223674	1.15367
TTC3	37073226	37203112	q22.13	Ttc3	82.23 (n)	16	0	87.9523	259.649	244.034		0.939861	0.338735	1.2786
DSCR3(VPS26C)	37223420	37267919	q22.13	Dscr3	85.25 (n)	16	0	15.2806	24.7426	25.0118		1.01088	0.617583	1.62846
DYRK1A	37365790	37517450	q22.13	Dyrk1a	93.93 (n)	16	0.00558786	17.5915	23.6118	23.5135		0.995837	0.74503	1.74087
KCNJ6	37607376	37916446	q22.13	Kcnj6	90.23 (n)	16	0	1.06518	2.07336	2.08773		1.00693	0.513746	1.52068
ERG	38380027	38661780	q22.2	Erg	89.85 (n)	16	0	0.36729	2.82167	2.21647		0.785517	0.130168	0.915685
ETS2	38805307	38824955	q22.2	Ets2	85.94 (n)	16	0	4.25749	9.60998	9.57314		0.996166	0.443028	1.43919
PSMG1	39174769	39183851	q22.2	Psmg1	80.9 (n	16	0	15.6183	61.3305	57.8396	RNA-seq readthough	0.943081	0.254658	1.19774
BRWD1	39184176	39321559	q22.2	Brwd1	81.6 (n)	16	0	25.6729	61.3305	57.8396		0.943081	0.418599	1.36168
HMGN1	39342315	39349647	q22.2	Hmgn1	81.05 (n)	16	0.0721298	70.3674	72.0593	72.2519		1.00267	0.976521	1.97919
WRB	39380244	39428528	q22.2	Wrb	86.21 (n)	16	0	30.0914	27.3512	27.6271		1.01009	1.10019	2.11027
LCA5L	39405844	39445805	q22.2	Lca5l	70.76 (n)	16	0	2.3938	1.35315	1.32244		0.977305	1.76906	2.74636
B3GALT5	39556442	39673137	q22.2	B3galt5	74.27 (n)	16	0	0.325928	1.19991	1.59759		1.33142	0.271627	1.60305
IGSF5	39745407	39802096	q22.2	Igsf5	66 (n)	16	0	0.136356	58.7122	60.2461	RNA-seq readthough	1.02613	0.00232245	1.02845
PCP4	39867317	39929397	q22.2	Pcp4	89.25 (n)	16	0	25.9889	58.7122	60.2461		1.02613	0.442649	1.46877
DSCAM	40010999	40847139	q22.2	Dscam	90.11 (n)	16	0	3.06501	8.57138	9.27568		1.08217	0.357587	1.43976
PRDM15	41798225	41879482	q22.3	Prdm15	85.32 (n)	16	0	3.38301	7.19298	5.23082		0.727212	0.470321	1.19753
C2CD2	41885112	41953890	q22.3	C2cd2	76.6 (n)	16	0	9.60761	3.55001	3.36831		0.948817	2.70636	3.65518
ZBTB21	41986831	42010387	q22.3	Zbtb21	83.04 (n	16	0	1.69286	3.02071	2.45032		0.811174	0.560418	1.37159
ABCG1	42199689	42297244	q22.3	Abcg1	87.69 (n)	17	0	1.302	2.95725	2.7634		0.934449	0.440274	1.37472
RSPH1	42472486	42496354	q22.3	Rsph1	80.27 (n)	17	0	3.11871	3.80567	3.84483		1.01029	0.81949	1.82978
SLC37A1	42496008	42581440	q22.3	Slc37a1	83.24 (n)	17	0	6.23685	3.36813	3.3518		0.995152	1.85172	2.84688
PDE9A	42653636	42775509	q22.3	Pde9a	87.4 (n)	17	0	2.18472	37.5082	31.7553		0.846623	0.0582465	0.904869
WDR4	42843094	42879568	q22.3	Wdr4	79.92 (n)	17	0	5.31804	20.1122	18.7865		0.934085	0.264419	1.1985
NDUFV3	42879644	42913304	q22.3	Ndufv3	65.87 (n)	17	0	7.88858	102.881	103.468		1.00571	0.0766767	1.08238
PKNOX1	42974510	43033931	q22.3	Pknox1	87.61 (n)	17	0	2.87769	9.06017	7.56982		0.835505	0.31762	1.15313
CBS	43053191	43076943	q22.3	Cbs	82.66 (n)	17	0	30.138	9.98579	10.1743		1.01888	3.01809	4.03697
U2AF1	43092956	43107587	q22.3	U2af1	90(n)	17	0.208775	4.19253	76.4965	71.3065		0.932154	0.0548068	0.986961
SIK1	43414515	43427128	q22.3	sik1	80(n)	17	0	0	7.80134	8.24173		1.05645	0	1.05645
RRP1B	43659548	43696079	q22.3	Rrp1b	74.65 (n)	17	0	7.24296	13.6176	12.5713		0.923166	0.531882	1.45505
PDXK	43719094	43762307	q22.3	Pdxk	84.72 (n)	10	0	24.5337	10.3336	11.4902		1.11193	2.37417	3.48609
CSTB	43772511	43776445	q22.3	Cstb	77.21 (n)	10	0	11.9492	28.556	30.4021		1.06465	0.418448	1.4831
RRP1	43789513	43805293	q22.3	Rrp1	58 (a)	10	0	21.2896	127.007	120.123		0.945798	0.167625	1.11342
AGPAT3	43865186	43986536	q22.3	Agpat3	86.08 (n)	10	0	5.16267	45.6483	49.3714		1.08156	0.113097	1.19466
TRAPPC10	44012319	44106552	q22.3	Trappc	84.95 (n)	10	0	11.2222	24.4432	24.0789		0.985096	0.459113	1.44421
PWP2	44107290	44131181	q22.3	Pwp2	89 (a)	10	0	1.41846	12.2384	11.1014		0.907096	0.115902	1.023
C21orf33(GATD3A)	44133605	44145723	q22.3	D10Jhu81e	83.08 (n)	10	0	3.697	18.8551	20.5555		1.09018	0.196074	1.28626
PFKL	44300051	44327376	q22.3	Pfkl	87.22 (n)	10	0	11.3667	25.1507	26.5261		1.05469	0.451944	1.50663
C21orf2(CFAP410)	44328944	44339402	q22.3	1810043G02Rik	79.38 (n)	10	0	1.60983	16.6563	15.5253		0.932098	0.0966499	1.02875
TRPM2	44350163	44443081	q22.3	Trpm2	83.5 (n)	10	0	8.00382	3.36179	4.39875		1.30845	2.38082	3.68928
LRRC3	44455486	44462196	q22.3	Lrrc3	79.64 (n)	10	0	2.87739	11.612	10.9662		0.944385	0.247795	1.19218
UBE2G2	44768580	44802019	q22.3	Ube2g2	89.49 (n)	10	0	22.0446	158.859	158.211	RNA-seq readthough	0.995921	0.138768	1.13469
SUMO3	44805617	44818779	q22.3	Sumo3	90.94 (n)	10	0.0185075	31.7186	158.859	158.211		0.995921	0.199665	1.19559
PTTG1IP	44849585	44873903	q22.3	Pttg1ip	77.97 (n)	10	0	20.2084	21.652	23.0617		1.06511	0.933327	1.99843
FAM207A	44940010	44976989	q22.3	Fam207a	79.69 (n)	10	0	7.65307	8.42304	8.04911		0.955606	0.908588	1.86419
ADARB1	45073853	45226560	q22.3	Adarb1	87.73 (n)	10	0	0.511529	18.0394	19.8897		1.10257	0.0283562	1.13093
POFUT2	45263928	45287898	q22.3	Pofut2	84.07 (n	10	0	19.0618	9.31953	10.0212		1.07529	2.04536	3.12065
COL18A1	45405137	45513720	q22.3	Col18a1	75.59 (n)	10	0	0	6.48156	7.00659	deletion D	1.081	0	1.081
SLC19A1	45493572	45544411	q22.3	Slc19a1	73.87 (n)	10	0	0	15.736	15.6459	deletion D	0.994274	0	0.994274
PCBP3	45643694	45942454	q22.3	Pcbp3	93.08 (n)	10	0	0	20.3467	30.3115	deletion D	1.48975	0	1.48975
COL6A1	45981737	46005050	q22.3	Col6a1	83.15 (n)	10	0	0	10.1865	13.5372	deletion D	1.32894	0	1.32894
COL6A2	46098097	46132849	q22.3	Col6a2	85.38 (n)	10	0	0.144449	6.21044	8.96354	deletion D	1.4433	0.0232591	1.46656
LSS	46188141	46228824	q22.3	Lss	83.04 (n)	10	0	0	26.4025	25.3935	deletion D	0.961784	0	0.961784
MCM3AP	46235126	46286297	q22.3	Mcm3ap	80.39 (n)	10	0	13.3203	14.3199	13.8148		0.964727	0.930195	1.89492
PCNT	46324122	46445769	q22.3	Pcnt	61 (a) or75 (n)	10	0	10.8025	4.49371	3.84221		0.85502	2.40392	3.25894
DIP2A	46458899	46569852	q22.3	Dip2a	87 (n)	10	0	33.4089	27.0201	24.9722		0.924208	1.23645	2.16065
S100B	46598962	46605208	q22.3	S100b	85.51 (n)	10	0	16.3764	1.19	2.59793		2.18313	13.7617	15.9448
PRMT2	46635595	46665124	q22.3	Prmt2	83.76 (n)	10	0	60.2429	74.0751	73.1433		0.987421	0.813268	1.80069
