# Supplementary material for: A non-mosaic transchromosomic mouse model of Down syndrome carrying the long arm of human chromosome 21
Source: eLife. 2020 Jun 29;9:e56223. doi: 10.7554/eLife.56223 (PMC7358007; doi:10.7554/eLife.56223)
Supplement: Figure 3—source data 2. [file elife-56223-fig3-data2.xlsx]

## Sheet: Sheet1
Figure 3D	hCOT-1 positive	Interphase analyzed	Retention rate (%)
Brain	190	200	95
Thymus	194	200	97
Heart	196	200	98
Lung	197	200	98.5
Liver	190	200	95
Spleen	197	200	98.5
Kidney	200	200	100
Intestine	192	200	96
Muscle	195	200	97.5
Figure 3E	Ratio of GFP expressing cells (%)
CD19+	95.59
CD4+	97.45
CD8+	92.5
