# Supplementary material for: A non-mosaic transchromosomic mouse model of Down syndrome carrying the long arm of human chromosome 21
Source: eLife. 2020 Jun 29;9:e56223. doi: 10.7554/eLife.56223 (PMC7358007; doi:10.7554/eLife.56223)
Supplement: Figure 6—source data 2. [file elife-56223-fig6-data2.xlsx]

## Sheet: Figure 6-Data 2A growth
Fig. 6A
	Weight (female and male were seperated)
		2 way ANOVA and Turkey post-hoc
	Genotype effects	Adjusted P Value
	Eu(F) vs. MAC21(F)	< 0.0001
	Eu(M) vs. MAC21(M)	< 0.0001
	Gender	Postnatal day	Comparing pair	Eu	Eu	MAC21	MAC21	MAC21-Eu	MAC21-Eu	one way ANOVA and Turkey post-hoc
				mean(g)	SD(g)	mean(g)	SD(g)	mean diff (g)	mean diff(% of Eu)	adjust p value
	Female	P1	Eu(n=14) vs. MAC21( n=9)	1.389	0.187734	1.332	0.167614	-0.05635	-0.0405688	0.9
	Male	P1	Eu(n=9) vs. MAC21(n=14)	1.463	0.138203	1.356	0.224558	-0.1076	-0.0735475	0.55
	Female	P6	Eu(n=27) vs. MAC21(n=14)	3.653	0.751182	3.474	0.82069	-0.179	-0.0490008	0.88
	Male	P6	Eu(n=18) vs. MAC21n=21)	4.169	0.876856	3.218	0.455477	-0.9518	-0.228304	0.0007
	Female	P14	Eu(n=24) vs. MAC21( n=12)	7.408	1.14053	6.992	1.08499	-0.4167	-0.05625	0.76
	Male	P14	Eu(n=16) vs. MAC21(n=15)	7.631	1.56022	6.167	0.890158	-1.465	-0.19198	0.0063
	Female	P20	Eu(n=24) vs. MAC21(n=12)	8.954	1.2462	7.808	1.13655	-1.146	-0.127987	0.13
	Male	P20	Eu(n=16) vs. MAC21(n=15)	9.813	2.24199	7.387	0.779072	-2.426	-0.247223	0.0001
	Female	P27	Eu(n=21) vs. MAC21(n=11)	14.34	1.7772	12.32	1.89695	-2.019	-0.140795	0.061
	Male	P27	Eu(n=15) vs. MAC21(n=12)	15.23	2.80835	13.09	1.82948	-2.14	-0.140512	0.054
	Female	P35	Eu(n=23) vs. MAC21(n=12)	17.3	1.42206	15.85	1.46381	-1.454	-0.0840462	0.13
	Male	P35	Eu(n=19) vs. MAC21(n=20)	20.7	2.13698	17.79	2.14105	-2.91	-0.14058	< 0.0001
	Female	P90	Eu(n=18) vs. MAC21(n=15)	22.84	2.67191	17.63	1.82274	-5.211	-0.228152	< 0.0001
	Male	P90	Eu(n=18) vs. MAC21(n=16)	28.63	2.45333	20.95	1.28737	-7.683	-0.268355	< 0.0001

## Sheet: Figure 6-Data 2B nesting
Fig 6B
One-way ANOVA
Tukey's multiple comparisons test	Mean Diff.	95% CI of diff.	Significant?	Summary	Adjusted P Value
Eu(F) vs. MAC21(F)	0.2644	-1.063 to 1.592	No	ns	0.9502
Eu(F) vs. Eu(M)	-0.2411	-1.853 to 1.371	No	ns	0.9778
Eu(F) vs. MAC21(M)	-0.09821	-1.710 to 1.513	No	ns	0.9984
MAC21(F) vs. Eu(M)	-0.5055	-2.173 to 1.162	No	ns	0.8477
MAC21(F) vs. MAC21(M)	-0.3626	-2.030 to 1.305	No	ns	0.9364
Eu(M) vs. MAC21(M)	0.1429	-1.758 to 2.044	No	ns	0.997
Test details	Mean 1	Mean 2	Mean Diff.	SE of diff.	n1	n2	q	DF
Eu(F) vs. MAC21(F)	4.188	3.923	0.2644	0.4949	16	13	0.7557	39
Eu(F) vs. Eu(M)	4.188	4.429	-0.2411	0.6006	16	7	0.5677	39
Eu(F) vs. MAC21(M)	4.188	4.286	-0.09821	0.6006	16	7	0.2313	39
MAC21(F) vs. Eu(M)	3.923	4.429	-0.5055	0.6213	13	7	1.151	39
MAC21(F) vs. MAC21(M)	3.923	4.286	-0.3626	0.6213	13	7	0.8254	39
Eu(M) vs. MAC21(M)	4.429	4.286	0.1429	0.7084	7	7	0.2852	39

## Sheet: Figure 6–Data 2C. Open field
Fig 6C
One-way ANOVA
Tukey's multiple comparisons test	Mean Diff.	95% CI of diff.	Significant?	Summary	Adjusted P Value
Eu(F) vs. MAC21(F)	2.846	-19.60 to 25.30	No	ns	0.9864
Eu(F) vs. Eu(M)	11.23	-11.22 to 33.68	No	ns	0.5444
Eu(F) vs. MAC21(M)	7.262	-14.70 to 29.22	No	ns	0.8128
MAC21(F) vs. Eu(M)	8.385	-14.55 to 31.32	No	ns	0.7626
MAC21(F) vs. MAC21(M)	4.416	-18.03 to 26.87	No	ns	0.9523
Eu(M) vs. MAC21(M)	-3.969	-26.42 to 18.48	No	ns	0.9646
Test details	Mean 1	Mean 2	Mean Diff.	SE of diff.	n1	n2	q	DF
Eu(F) vs. MAC21(F)	64.04	61.2	2.846	8.393	12	11	0.4795	42
Eu(F) vs. Eu(M)	64.04	52.81	11.23	8.393	12	11	1.892	42
Eu(F) vs. MAC21(M)	64.04	56.78	7.262	8.208	12	12	1.251	42
MAC21(F) vs. Eu(M)	61.2	52.81	8.385	8.573	11	11	1.383	42
MAC21(F) vs. MAC21(M)	61.2	56.78	4.416	8.393	11	12	0.7441	42
Eu(M) vs. MAC21(M)	52.81	56.78	-3.969	8.393	11	12	0.6687	42
Fig 6D
Time% spent in the Center in 5 min blocks
Effect	Repeated Measures Analysis of Variance (TaskOF MAC21) Sigma-restricted parameterization Effective hypothesis decomposition; Std. Error of Estimate: 17.6075 Include condition: v6=1
	SS	Degr. of	MS	F	p
Intercept	69238.5	1	69238.5	223.334	0
GeneCode	3951.38	1	3951.38	12.7455	0.000910009
Gender	87.6529	1	87.6529	0.282731	0.597718
GeneCode*Gender	358.173	1	358.173	1.15531	0.288576
Error	13020.9	42	310.023
BLOCK	5913.61	5	1182.72	18.6712	2.44249e-15
BLOCK*GeneCode	822.021	5	164.404	2.59539	0.0265587
BLOCK*Gender	638.51	5	127.702	2.01598	0.0776702
BLOCK*GeneCode*Gender	407.391	5	81.4783	1.28627	0.270994
Error	13302.4	210	63.3448
Cell No.	GeneCode*Gender; Unweighted Means (TaskOF MAC21) Current effect: F(1, 42)=1.1553, p=.28858 Effective hypothesis decomposition Include condition: v6=1
Genotype	Gender	N
Eu(F)	F	12
Eu(M)	M	11
MAC21(F)	F	11
MAC21(M)	M	12
LSD test; variable DV_1 (TaskOF MAC21) Probabilities for Post Hoc Tests Error: Between MSE = 310.02, df = 42.000 Include condition: v6=1
GeneCode	Eu(F)	MAC21(F)	Eu(M)	MAC21(M)
Eu(F)
MAC21(F)	0.00206581
Eu(M)
MAC21(M)			0.0849382
