# Supplementary material for: A non-mosaic transchromosomic mouse model of Down syndrome carrying the long arm of human chromosome 21
Source: eLife. 2020 Jun 29;9:e56223. doi: 10.7554/eLife.56223 (PMC7358007; doi:10.7554/eLife.56223)
Supplement: Figure 7—source data 1. [file elife-56223-fig7-data1.xlsx]

## Sheet: Figure 7–Data 1A. Visual discr
Visual Discruimination (3 positions of flaged platform changed every 2 trials: W to E to S)
Figure 7–figure supplement 1C		LATENCY						Figure 7–figure supplement 1D		DISTANCE
Effect	Repeated Measures Analysis of Variance (Spreadsheet1) Sigma-restricted parameterization Effective hypothesis decomposition; Std. Error of Estimate: 22.2182							Effect	Repeated Measures Analysis of Variance (Spreadsheet1) Sigma-restricted parameterization Effective hypothesis decomposition; Std. Error of Estimate: 4.2718
	SS	Degr. of	MS	F	p				SS	Degr. of	MS	F	p
Intercept	47679.4	1	47679.4	96.5857	1.45861e-12			Intercept	2158.92	1	2158.92	118.308	6.32827e-14
GeneCode	626.695	1	626.695	1.26952	0.266106			GeneCode	32.8473	1	32.8473	1.80003	0.186752
Gender	15.3334	1	15.3334	0.0310614	0.860931			Gender	8.42693	1	8.42693	0.461793	0.500429
GeneCode*Gender	1213.97	1	1213.97	2.45917	0.124171			GeneCode*Gender	61.0526	1	61.0526	3.34567	0.0743224
Error	21226.9	43	493.649					Error	784.675	43	18.2483
Positions	3415.99	2	1708	10.6685	7.26445e-05			PAIR	262.056	2	131.028	14.5075	3.72387e-06
positions*GeneCode	140.437	2	70.2184	0.438599	0.646374			PAIR*GeneCode	5.61845	2	2.80923	0.311039	0.733506
positions*Gender	5.65535	2	2.82768	0.0176623	0.982496			PAIR*Gender	3.75126	2	1.87563	0.207671	0.81288
positions*GeneCode*Gender	235.923	2	117.961	0.736812	0.481634			PAIR*GeneCode*Gender	53.4332	2	26.7166	2.95808	0.0572246
Error	13768.3	86	160.097					Error	776.73	86	9.03174
TR	774.672	1	774.672	7.43914	0.00920228			TR	61.1918	1	61.1918	7.63869	0.00837718
TR*GeneCode	0.141082	1	0.141082	0.00135481	0.970809			TR*GeneCode	0.0717204	1	0.0717204	0.00895298	0.925056
TR*Gender	9.40118	1	9.40118	0.0902791	0.765271			TR*Gender	0.651336	1	0.651336	0.0813075	0.776902
TR*GeneCode*Gender	130.145	1	130.145	1.24978	0.269801			TR*GeneCode*Gender	0.666635	1	0.666635	0.0832172	0.77437
Error	4477.79	43	104.135					Error	344.464	43	8.01078
positions*TR	445.019	2	222.509	1.49368	0.23031			PAIR*TR	57.3617	2	28.6809	2.84114	0.06385
positions*TR*GeneCode	98.5027	2	49.2513	0.33062	0.719388			PAIR*TR*GeneCode	4.73329	2	2.36665	0.234441	0.791517
positions*TR*Gender	53.3834	2	26.6917	0.179179	0.836268			PAIR*TR*Gender	1.46224	2	0.731119	0.072425	0.930192
positions*TR*GeneCode*Gender	299.984	2	149.992	1.00688	0.369622			PAIR*TR*GeneCode*Gender	11.1531	2	5.57655	0.552415	0.577587
Error	12811.1	86	148.967					Error	868.157	86	10.0948
	GeneCode*Gender; Unweighted Means (Spreadsheet1) Current effect: F(1, 43)=2.4592, p=.12417 Effective hypothesis decomposition
	Genotype	GeneCode	Gender	Mean	SEM	N
	Eu	5	F	16.8423	2.51572	13
	Eu	5	M	12.2152	2.73487	11
	MAC21	6	F	9.69394	2.73487	11
	MAC21	6	M	13.3861	2.61844	12

## Sheet: Figure 7–Data 1B. MWM
	Classical Morris Water maze (MWM)
	Figure 7–figure supplement 2B	acquisition trials (Speed)	(all males and females together)
		Effect	Repeated Measures Analysis of Variance (TaskQ LatDisSpeed MAC21) Sigma-restricted parameterization Effective hypothesis decomposition; Std. Error of Estimate: 0.1478 Include condition: v6=1
			SS	Degr. of	MS	F	p
		Intercept	41.2921	1	41.2921	1891.15	0
		GeneCode	0.000213693	1	0.000213693	0.00978699	0.921689
		Gender	0.0672864	1	0.0672864	3.08167	0.0868354
		GeneCode*Gender	7.85867e-07	1	7.85867e-07	3.59922e-05	0.995243
		Error	0.873376	40	0.0218344
		DAYS	0.488667	3	0.162889	37.544	0
		DAYS*GeneCode	0.0577273	3	0.0192424	4.43516	0.0054071
		DAYS*Gender	0.0673064	3	0.0224355	5.17112	0.00214217
		DAYS*GeneCode*Gender	0.00601982	3	0.00200661	0.4625	0.708993
		Error	0.520634	120	0.00433861
		TR	0.252516	7	0.0360737	29.3155	0
		TR*GeneCode	0.00383892	7	0.000548417	0.445674	0.872715
		TR*Gender	0.00867496	7	0.00123928	1.00711	0.426351
		TR*GeneCode*Gender	0.0110559	7	0.00157941	1.28351	0.258305
		Error	0.34455	280	0.00123053
		DAYS*TR	0.0435515	21	0.00207388	1.60436	0.0419151
		DAYS*TR*GeneCode	0.0378544	21	0.00180259	1.39449	0.111402
		DAYS*TR*Gender	0.0249821	21	0.00118962	0.920295	0.564465
		DAYS*TR*GeneCode*Gender	0.0381359	21	0.00181599	1.40486	0.106482
		Error	1.08583	840	0.00129265
		POST hoc
		Tukey's multiple comparisons test	Mean Diff.	95% CI of diff.	Significant?	Summary	Adjusted P Value
		Eu(F) vs. MAC21(F)	-0.0007909	-0.03136 to 0.02978	No	ns	0.9999
		Eu(F) vs. Eu(M)	-0.01393	-0.04450 to 0.01665	No	ns	0.6174
		Eu(F) vs. MAC21(M)	-0.01466	-0.04462 to 0.01530	No	ns	0.5612
		MAC21(F) vs. Eu(M)	-0.01314	-0.04297 to 0.01670	No	ns	0.6427
		MAC21(F) vs. MAC21(M)	-0.01387	-0.04308 to 0.01534	No	ns	0.5853
		Eu(M) vs. MAC21(M)	-0.0007311	-0.02994 to 0.02848	No	ns	0.9999
	Figure 7–figure supplement 2C	acquisition trials (Latency)	(all males and females together)
		Effect	Repeated Measures Analysis of Variance (TaskQ LatDisSpeed MAC21) Sigma-restricted parameterization Effective hypothesis decomposition; Std. Error of Estimate: 12.3897 Include condition: v6=1
			SS	Degr. of	MS	F	p
		Intercept	62727.1	1	62727.1	408.631	0
		GeneCode	768.674	1	768.674	5.00747	0.0308743
		Gender	308.424	1	308.424	2.00921	0.16409
		GeneCode*Gender	53.688	1	53.688	0.349747	0.557584
		Error	6140.22	40	153.506
		DAY	3906.23	3	1302.08	27.734	1.07248e-13
		DAY*GeneCode	115.178	3	38.3928	0.817761	0.486488
		DAY*Gender	167.673	3	55.891	1.19047	0.316395
		DAY*GeneCode*Gender	120.694	3	40.2312	0.856919	0.465584
		Error	5633.84	120	46.9487
	Figure 7A	LSD post hoc	LSD test; variable DV_1 (TaskQ LatDisSpeed MAC21) Probabilities for Post Hoc Tests Error: Between MSE = 153.51, df = 40.000 Include condition: v6=1
			Eu(F) (n=10)	Eu(M) (n=11)
		MAC21(F) (N=11)	0.261706
		MAC21 (M) (n=12)		0.0471869
	Figure 7–figure supplement 2C	acquisition trials (DISTANCE)	(all males and females together)
		Effect	Repeated Measures Analysis of Variance (TaskQ LatDisSpeed MAC21) Sigma-restricted parameterization Effective hypothesis decomposition; Std. Error of Estimate: 2.0688 Include condition: v6=1
			SS	Degr. of	MS	F	p
		Intercept	2029.79	1	2029.79	474.277	0
		GeneCode	27.5696	1	27.5696	6.44184	0.0151444
		Gender	1.35001	1	1.35001	0.315441	0.577494
		GeneCode*Gender	1.70596	1	1.70596	0.39861	0.5314
		Error	171.191	40	4.27977
		DAYS	270.513	3	90.1711	52.5028	0
		DAYS*GeneCode	12.2202	3	4.0734	2.37177	0.0738056
		DAYS*Gender	2.93043	3	0.97681	0.568755	0.63665
		DAYS*GeneCode*Gender	2.75312	3	0.917706	0.534341	0.659613
		Error	206.095	120	1.71745
		LSD test; variable DV_1 (TaskQ LatDisSpeed MAC21) Probabilities for Post Hoc Tests Error: Between; Within; Pooled MSE = 2.2957, df = 138.11 Include condition: v6=1
			Eu Day1(n=21)	Eu Day2(n=21)	Eu Day3 (n=21)	Eu Day4 (n=21)
		MAC21 Day1(n=23)	0.133621
		MAC21 Day2(n=23)		0.000481779
		MAC21 Day3(n=23)			0.105678
		MAC21 Day4(n=23)				0.759564
	Figure 7A	LSD post hoc
		LSD test; variable DV_1 (TaskQ LatDisSpeed MAC21) Probabilities for Post Hoc Tests Error: Between MSE = 4.2798, df = 40.000 Include condition: v6=1
			Eu(F) (n=10)	Eu(M) (n=11)
		MAC21(F) (N=11)	0.194836
		MAC21 (M) (n=12)		0.0271141
	Figure 7–figure supplement 2D	Short delay probe trial
		Effect	Repeated Measures Analysis of Variance (TaskQ ProbeTrials MAC21) Sigma-restricted parameterization Effective hypothesis decomposition; Std. Error of Estimate: 18.3056 Include condition: v6=1
			SS	Degr. of	MS	F	p
		Intercept	274793	1	274793	820.046	0
		Gender	119.936	1	119.936	0.357917	0.553038
		GeneCode	3617.79	1	3617.79	10.7963	0.00212138
		Gender*GeneCode	98.8923	1	98.8923	0.295117	0.589974
		Error	13403.8	40	335.095
		TR	12069.5	3	4023.16	28.3522	6.26166e-14
		TR*Gender	968.188	3	322.729	2.27436	0.0834302
		TR*GeneCode	129.858	3	43.2859	0.305047	0.821697
		TR*Gender*GeneCode	37.6805	3	12.5602	0.0885146	0.966227
		Error	17027.9	120	141.899
		Effect	Repeated Measures Analysis of Variance (TaskQ ProbeTrials MAC21) Sigma-restricted parameterization Effective hypothesis decomposition; Std. Error of Estimate: 18.0166 Include condition: v6=1
			SS	Degr. of	MS	F	p
		Intercept	274866	1	274866	846.793	0
		GeneCode	3677.41	1	3677.41	11.3292	0.00164037
		Error	13633	42	324.596
		SESS	12011.1	3	4003.72	27.9496	6.36158e-14
		SESS*GeneCode	129.399	3	43.1331	0.301109	0.824544
		Error	18049.2	126	143.248
			LSD test; variable DV_1 (TaskQ ProbeTrials MAC21) Probabilities for Post Hoc Tests Error: Between; Within; Pooled MSE = 188.58, df = 143.18 Include condition: v6=1
			Eu Day1(n=21)	Eu Day2(n=21)	Eu Day3 (n=21)	Eu Day4 (n=21)
		MAC21 Day1(n=23)	0.0135208
		MAC21 Day2(n=23)		0.0279762
		MAC21 Day3(n=23)			0.0108385
		MAC21 Day4(n=23)				0.128415
	Figure 7B	LSD test; variable DV_1 (TaskQ ProbeTrials MAC21) Probabilities for Post Hoc Tests Error: Between MSE = 335.09, df = 40.000 Include condition: v6=1
		GeneCode	Eu(F) (n=10)	Eu(M) (n=11)
		MAC21(F) (N=11)	0.0651376
		MAC21 (M) (n=12)		0.00842702
	Figure 7–figure supplement 2E	Long delay probe trial
		Effect	Repeated Measures Analysis of Variance (TaskQ ProbeTrials MAC21) Sigma-restricted parameterization Effective hypothesis decomposition; Std. Error of Estimate: 12.2322 Include condition: v6=1
			SS	Degr. of	MS	F	p
		Intercept	174764	1	174764	1168	0
		Gender	1040.37	1	1040.37	6.95309	0.0118564
		GeneCode	2835.03	1	2835.03	18.9473	9.05499e-05
		Gender*GeneCode	119.073	1	119.073	0.795799	0.377688
		Error	5985.08	40	149.627
		TR	3951	3	1317	15.9829	8.33615e-09
		TR*Gender	755.555	3	251.852	3.05643	0.0310375
		TR*GeneCode	307.43	3	102.477	1.24364	0.297026
		TR*Gender*GeneCode	188.393	3	62.7976	0.762102	0.517484
		Error	9888.07	120	82.4006
		LSD test; variable DV_1 (TaskQ ProbeTrials MAC21) Probabilities for Post Hoc Tests Error: Between; Within; Pooled MSE = 106.63, df = 150.61 Include condition: v6=1
		SES	Eu Day1(n=21)	Eu Day2(n=21)	Eu Day3 (n=21)	Eu Day4 (n=21)
		MAC21 Day1(n=23)	0.0150578
		MAC21 Day2(n=23)		7.90606e-05
		MAC21 Day3(n=23)			0.0571799
		MAC21 Day4(n=23)				0.0474993
	Figure 7C	LSD test; variable DV_1 (TaskQ ProbeTrials MAC21) Probabilities for Post Hoc Tests Error: Between MSE = 149.63, df = 40.000 Include condition: v6=1
		GeneCode	Eu(F) (n=10)	Eu(M) (n=11)
		MAC21(F) (N=11)	0.0214887
		MAC21 (M) (n=12)		0.000488357

## Sheet: Figure 7–Data 1C. RRWM
	Fig 7B	long delay probe (Reversal 1)
		Effect	Repeated Measures Analysis of Variance Sigma-restricted parameterization Effective hypothesis decomposition; Std. Error of Estimate: 22.3944
			SS	Degr. of	MS	F	p
		Intercept	221449	1	221449	441.563	1.53988e-12
		GeneCode	3332.65	1	3332.65	6.64522	0.0210049
		Error	7522.67	15	501.511
		SES	42359.3	2	21179.7	27.261	1.78758e-07
		SES*GeneCode	3807.05	2	1903.53	2.45009	0.103372
		Error	23307.6	30	776.921
		GeneCode	N
		Eu(F)	8
		MAC21(F)	9
		POST-hoc	LSD test; variable DV_1 Probabilities for Post Hoc Tests Error: Between; Within; Pooled MSE = 685.12, df = 43.440
			GeneCode	Eu-Day1-SE	Eu-Day2-SE	Eu-Day3-SE	MAC21-Day1-SE	MAC21-Day2-SE	MAC21-Day3-SE
			Eu-Day1-SE
			Eu-Day2-SE	0.000877449
			Eu-Day3-SE	8.31165e-06	0.105238
			MAC21-Day1-SE	0.999805
			MAC21-Day2-SE		0.00287224		0.396528
			MAC21-Day3-SE			0.512661	2.01344e-05	0.000225025
	Fig 7C	long delay probe (Reversal 1)
		Effect	Repeated Measures Analysis of Variance Sigma-restricted parameterization Effective hypothesis decomposition; Std. Error of Estimate: 7.0318 Include condition: v6=1 Exclude condition: v3="M"
			SS	Degr. of	MS	F	p
		Intercept	21863	1	21863	442.161	1.52478e-12
		GeneCode	551.313	1	551.313	11.1498	0.00448414
		Error	741.687	15	49.4458
		SES	6610.86	2	3305.43	55.0817	9.06361e-11
		SES*GeneCode	646.836	2	323.418	5.38943	0.0100067
		Error	1800.29	30	60.0096
		GeneCode	N
		Eu(F)	8
		MAC21(F)	9
		POST-hoc	LSD test; variable DV_1 Probabilities for Post Hoc Tests Error: Between; Within; Pooled MSE = 56.488, df = 44.653 Include condition: v6=1 Exclude condition: v3="M"
			GeneCode	Eu-Day1	Eu-Day2	Eu-Day3
			MAC21-Day1	0.361853
			MAC21-Day2		0.00812151
			MAC21-Day3			0.00089019
	Figure 7–figure supplement 3B	acquisition trials (latency) Reversal 1
		Effect	Repeated Measures Analysis of Variance Sigma-restricted parameterization Effective hypothesis decomposition; Std. Error of Estimate: 24.9144 Include condition: v6=1 and v3="F"
			SS	Degr. of	MS	F	p
		Intercept	94166.3	1	94166.3	151.703	3.02515e-09
		GeneCode	2859.7	1	2859.7	4.60701	0.0486058
		Error	9310.91	15	620.727
		TR	11664.6	15	777.638	5.50695	1.71373e-09
		TR*GeneCode	1545.81	15	103.054	0.729793	0.752976
		Error	31772.3	225	141.21
		GeneCode	N
		Eu(F)	8
		MAC21(F)	9
	Figure 7–figure supplement 3B	acquisition trials (DISTANCE) Reversal 1
		Distance to the platform
		Effect	Repeated Measures Analysis of Variance (TaskR LatDisSpeed MAC21 corrected Ts65 not corrected) Sigma-restricted parameterization Effective hypothesis decomposition; Std. Error of Estimate: 5.8250 Include condition: v6=1 and v3="F"
			SS	Degr. of	MS	F	p
		Intercept	3253.43	1	3253.43	95.8864	6.58267e-08
		GeneCode	77.4763	1	77.4763	2.28341	0.151542
		Error	508.951	15	33.9301
		TR	730.697	15	48.7131	7.27987	5.22804e-13
		TR*GeneCode	98.3873	15	6.55915	0.980224	0.476934
		Error	1505.58	225	6.69148
		GeneCode	N
		Eu(F)	8
		MAC21(F)	9
	Figure 7–figure supplement 3B	Short delay probe (Reversal 1)
		Effect	Repeated Measures Analysis of Variance (TaskR PROBES MAC21 and Ts65) Sigma-restricted parameterization Effective hypothesis decomposition; Std. Error of Estimate: 6.9450 Include condition: v3="F" and v6=1
			SS	Degr. of	MS	F	p
		Intercept	45293.5	1	45293.5	939.055	6.10623e-15
		GeneCode	194.363	1	194.363	4.02966	0.063074
		Error	723.496	15	48.233
		SES	57.4817	1	57.4817	1.0842	0.314254
		SES*GeneCode	29.1067	1	29.1067	0.548998	0.470168
		Error	795.266	15	53.0178
		OLDNEW	14408.3	1	14408.3	44.853	7.13912e-06
		OLDNEW*GeneCode	168.025	1	168.025	0.52306	0.480666
		Error	4818.51	15	321.234
		SES*OLDNEW	1355.35	1	1355.35	12.6892	0.00283741
		SES*OLDNEW*GeneCode	435.376	1	435.376	4.07612	0.0617376
		Error	1602.17	15	106.811
		GeneCode	N
		Eu(F)	8
		MAC21(F)	9
		Post-hoc	LSD test; variable DV_1 (TaskR PROBES MAC21 and Ts65) Probabilities for Post Hoc Tests Error: Between; Within; Pooled MSE = 77.522, df = 26.253 Include condition: v3="F" and v6=1
			GeneCode	Eu-Day1-SE	Eu-Day1-NW	Eu-Day2-SE	Eu-Day2-NW
			MAC21-Day1-SE	0.417949
			MAC21-Day1-NW		0.00558287
			MAC21-Day2-SE			0.358745
			MAC21-Day2-NW				0.971143
	Figure 7–figure supplement 3C	acquisition trials(latency) reversal 2
		Column B	MAC21(F)
		vs.	vs.
		Column A	Eu(F)
		Unpaired t test
		P value	0.0103
		P value summary	*
		Significantly different? (P < 0.05)	Yes
		One- or two-tailed P value?	Two-tailed
		t, df	t=2.737 df=30
		How big is the difference?
		Mean ± SEM of column A	11.54 ± 1.472 N=16
		Mean ± SEM of column B	17.27 ± 1.486 N=16
		Difference between means	5.727 ± 2.092
		95% confidence interval	1.454 to 10.00
		R square	0.1998
		F test to compare variances
		F,DFn, Dfd	1.019, 15, 15
		P value	0.9715
		P value summary	ns
		Significantly different? (P < 0.05)	No
	Figure 7–figure supplement 3C	acquisition trials (DISTANCE) Reversal 2
		Column B	MAC21(F)
		vs.	vs.
		Column A	Eu(F)
		Unpaired t test
		P value	0.1663
		P value summary	ns
		Significantly different? (P < 0.05)	No
		One- or two-tailed P value?	Two-tailed
		t, df	t=1.419 df=30
		How big is the difference?
		Mean ± SEM of column A	1.822 ± 0.3094 N=16
		Mean ± SEM of column B	2.468 ± 0.3341 N=16
		Difference between means	0.6460 ± 0.4553
		95% confidence interval	-0.2839 to 1.576
		R square	0.06288
		F test to compare variances
		F,DFn, Dfd	1.166, 15, 15
		P value	0.7701
		P value summary	ns
		Significantly different? (P < 0.05)	No
	Figure 7–figure supplement 3C	Short delay probe reversal
		Within each column, compare rows (simple effects within columns)
		Number of families	4
		Number of comparisons per family	28
		Alpha	0.05
		Tukey's multiple comparisons test	Mean Diff.	95% CI of diff.	Significant?	Summary	Adjusted P Value
		NW(new1)
		R1: Eu vs. R1:MAC21	6.104	-5.282 to 17.49	No	ns	0.7277
		R1: Eu vs. R2: Eu	-6.279	-17.14 to 4.577	No	ns	0.6438
		R1: Eu vs. R2:MAC21	-10.72	-22.11 to 0.6653	No	ns	0.0816
		R1: Eu vs. R3: Eu	7.813	-3.044 to 18.67	No	ns	0.3566
		R1: Eu vs. R3:MAC21	12.8	1.418 to 24.19	Yes	*	0.0155
		R1: Eu vs. R4: Eu	17.71	6.856 to 28.57	Yes	****	< 0.0001
		R1: Eu vs. R4:MAC21	14.62	3.233 to 26.01	Yes	**	0.0028
		R1:MAC21 vs. R2: Eu	-12.38	-23.77 to -0.9972	Yes	*	0.0223
		R1:MAC21 vs. R2:MAC21	-16.83	-28.72 to -4.933	Yes	***	0.0006
		R1:MAC21 vs. R3: Eu	1.708	-9.678 to 13.09	No	ns	0.9998
		R1:MAC21 vs. R3:MAC21	6.7	-5.192 to 18.59	No	ns	0.6743
		R1:MAC21 vs. R4: Eu	11.61	0.2222 to 22.99	Yes	*	0.0421
		R1:MAC21 vs. R4:MAC21	8.515	-3.377 to 20.41	No	ns	0.3634
		R2: Eu vs. R2:MAC21	-4.442	-15.83 to 6.944	No	ns	0.9341
		R2: Eu vs. R3: Eu	14.09	3.235 to 24.95	Yes	**	0.0023
		R2: Eu vs. R3:MAC21	19.08	7.697 to 30.47	Yes	****	< 0.0001
		R2: Eu vs. R4: Eu	23.99	13.14 to 34.85	Yes	****	< 0.0001
		R2: Eu vs. R4:MAC21	20.9	9.512 to 32.28	Yes	****	< 0.0001
		R2:MAC21 vs. R3: Eu	18.53	7.147 to 29.92	Yes	****	< 0.0001
		R2:MAC21 vs. R3:MAC21	23.53	11.63 to 35.42	Yes	****	< 0.0001
		R2:MAC21 vs. R4: Eu	28.43	17.05 to 39.82	Yes	****	< 0.0001
		R2:MAC21 vs. R4:MAC21	25.34	13.45 to 37.23	Yes	****	< 0.0001
		R3: Eu vs. R3:MAC21	4.992	-6.394 to 16.38	No	ns	0.8835
		R3: Eu vs. R4: Eu	9.9	-0.9563 to 20.76	No	ns	0.103
		R3: Eu vs. R4:MAC21	6.807	-4.579 to 18.19	No	ns	0.6036
		R3:MAC21 vs. R4: Eu	4.908	-6.478 to 16.29	No	ns	0.8923
		R3:MAC21 vs. R4:MAC21	1.815	-10.08 to 13.71	No	ns	0.9998
		R4: Eu vs. R4:MAC21	-3.093	-14.48 to 8.293	No	ns	0.9913
		SW(New2)
		R1: Eu vs. R1:MAC21	-5.475	-17.37 to 6.417	No	ns	0.8543
		R1: Eu vs. R2: Eu	10.02	-1.872 to 21.91	No	ns	0.1704
		R1: Eu vs. R2:MAC21	5.9	-5.992 to 17.79	No	ns	0.7992
		R1: Eu vs. R3: Eu	-19.55	-31.44 to -7.658	Yes	****	< 0.0001
		R1: Eu vs. R3:MAC21	-20.28	-32.17 to -8.383	Yes	****	< 0.0001
		R1: Eu vs. R4: Eu	-29.47	-41.36 to -17.58	Yes	****	< 0.0001
		R1: Eu vs. R4:MAC21	-35.7	-47.59 to -23.81	Yes	****	< 0.0001
		R1:MAC21 vs. R2: Eu	15.5	3.603 to 27.39	Yes	**	0.0022
		R1:MAC21 vs. R2:MAC21	11.38	-0.5174 to 23.27	No	ns	0.0723
		R1:MAC21 vs. R3: Eu	-14.08	-25.97 to -2.183	Yes	**	0.0084
		R1:MAC21 vs. R3:MAC21	-14.8	-26.69 to -2.908	Yes	**	0.0043
		R1:MAC21 vs. R4: Eu	-24	-35.89 to -12.10	Yes	****	< 0.0001
		R1:MAC21 vs. R4:MAC21	-30.23	-42.12 to -18.33	Yes	****	< 0.0001
		R2: Eu vs. R2:MAC21	-4.12	-16.01 to 7.772	No	ns	0.9648
		R2: Eu vs. R3: Eu	-29.57	-41.46 to -17.68	Yes	****	< 0.0001
		R2: Eu vs. R3:MAC21	-30.3	-42.19 to -18.40	Yes	****	< 0.0001
		R2: Eu vs. R4: Eu	-39.49	-51.38 to -27.60	Yes	****	< 0.0001
		R2: Eu vs. R4:MAC21	-45.72	-57.61 to -33.83	Yes	****	< 0.0001
		R2:MAC21 vs. R3: Eu	-25.45	-37.34 to -13.56	Yes	****	< 0.0001
		R2:MAC21 vs. R3:MAC21	-26.18	-38.07 to -14.28	Yes	****	< 0.0001
		R2:MAC21 vs. R4: Eu	-35.37	-47.26 to -23.48	Yes	****	< 0.0001
		R2:MAC21 vs. R4:MAC21	-41.6	-53.49 to -29.71	Yes	****	< 0.0001
		R3: Eu vs. R3:MAC21	-0.725	-12.62 to 11.17	No	ns	> 0.9999
		R3: Eu vs. R4: Eu	-9.92	-21.81 to 1.972	No	ns	0.1804
		R3: Eu vs. R4:MAC21	-16.15	-28.04 to -4.258	Yes	**	0.0011
		R3:MAC21 vs. R4: Eu	-9.195	-21.09 to 2.697	No	ns	0.2651
		R3:MAC21 vs. R4:MAC21	-15.43	-27.32 to -3.533	Yes	**	0.0024
		R4: Eu vs. R4:MAC21	-6.23	-18.12 to 5.662	No	ns	0.7506
	Figure 7–figure supplement 3C	Long delay probe trial reversal
		Within each column, compare rows (simple effects within columns)
		Number of families	4
		Number of comparisons per family	28
		Alpha	0.05
		Tukey's multiple comparisons test	Mean Diff.	95% CI of diff.	Significant?	Summary	Adjusted P Value
		SW(new2)
		R1: Eu vs. R1:MAC21	-2.45	-14.49 to 9.595	No	ns	0.9986
		R1: Eu vs. R2: Eu	2.87	-9.175 to 14.91	No	ns	0.9961
		R1: Eu vs. R2:MAC21	4.42	-7.625 to 16.46	No	ns	0.952
		R1: Eu vs. R3: Eu	7.375	-4.670 to 19.42	No	ns	0.573
		R1: Eu vs. R3:MAC21	4.375	-7.670 to 16.42	No	ns	0.9545
		R1: Eu vs. R4: Eu	-16.84	-28.88 to -4.795	Yes	***	0.0007
		R1: Eu vs. R4:MAC21	-17.41	-29.45 to -5.365	Yes	***	0.0004
		R1:MAC21 vs. R2: Eu	5.32	-6.725 to 17.36	No	ns	0.8792
		R1:MAC21 vs. R2:MAC21	6.87	-5.175 to 18.91	No	ns	0.6599
		R1:MAC21 vs. R3: Eu	9.825	-2.220 to 21.87	No	ns	0.2036
		R1:MAC21 vs. R3:MAC21	6.825	-5.220 to 18.87	No	ns	0.6675
		R1:MAC21 vs. R4: Eu	-14.39	-26.43 to -2.345	Yes	**	0.0075
		R1:MAC21 vs. R4:MAC21	-14.96	-27.00 to -2.915	Yes	**	0.0045
		R2: Eu vs. R2:MAC21	1.55	-10.49 to 13.59	No	ns	> 0.9999
		R2: Eu vs. R3: Eu	4.505	-7.540 to 16.55	No	ns	0.9469
		R2: Eu vs. R3:MAC21	1.505	-10.54 to 13.55	No	ns	> 0.9999
		R2: Eu vs. R4: Eu	-19.71	-31.75 to -7.665	Yes	****	< 0.0001
		R2: Eu vs. R4:MAC21	-20.28	-32.32 to -8.235	Yes	****	< 0.0001
		R2:MAC21 vs. R3: Eu	2.955	-9.090 to 15.00	No	ns	0.9953
		R2:MAC21 vs. R3:MAC21	-0.045	-12.09 to 12.00	No	ns	> 0.9999
		R2:MAC21 vs. R4: Eu	-21.26	-33.30 to -9.215	Yes	****	< 0.0001
		R2:MAC21 vs. R4:MAC21	-21.83	-33.87 to -9.785	Yes	****	< 0.0001
		R3: Eu vs. R3:MAC21	-3	-15.04 to 9.045	No	ns	0.9949
		R3: Eu vs. R4: Eu	-24.22	-36.26 to -12.17	Yes	****	< 0.0001
		R3: Eu vs. R4:MAC21	-24.79	-36.83 to -12.74	Yes	****	< 0.0001
		R3:MAC21 vs. R4: Eu	-21.22	-33.26 to -9.170	Yes	****	< 0.0001
		R3:MAC21 vs. R4:MAC21	-21.79	-33.83 to -9.740	Yes	****	< 0.0001
		R4: Eu vs. R4:MAC21	-0.57	-12.61 to 11.47	No	ns	> 0.9999
		NW(new1)
		R1: Eu vs. R1:MAC21	-3.5	-15.54 to 8.545	No	ns	0.987
		R1: Eu vs. R2: Eu	-21.07	-33.11 to -9.020	Yes	****	< 0.0001
		R1: Eu vs. R2:MAC21	-10.24	-22.28 to 1.810	No	ns	0.1621
		R1: Eu vs. R3: Eu	-37.88	-49.92 to -25.83	Yes	****	< 0.0001
		R1: Eu vs. R3:MAC21	-24.18	-36.22 to -12.13	Yes	****	< 0.0001
		R1: Eu vs. R4: Eu	-14.56	-26.60 to -2.510	Yes	**	0.0065
		R1: Eu vs. R4:MAC21	-10.78	-22.82 to 1.270	No	ns	0.1174
		R1:MAC21 vs. R2: Eu	-17.57	-29.61 to -5.520	Yes	***	0.0003
		R1:MAC21 vs. R2:MAC21	-6.735	-18.78 to 5.310	No	ns	0.6825
		R1:MAC21 vs. R3: Eu	-34.38	-46.42 to -22.33	Yes	****	< 0.0001
		R1:MAC21 vs. R3:MAC21	-20.68	-32.72 to -8.630	Yes	****	< 0.0001
		R1:MAC21 vs. R4: Eu	-11.06	-23.10 to 0.9896	No	ns	0.0984
		R1:MAC21 vs. R4:MAC21	-7.275	-19.32 to 4.770	No	ns	0.5904
		R2: Eu vs. R2:MAC21	10.83	-1.215 to 22.87	No	ns	0.1135
		R2: Eu vs. R3: Eu	-16.81	-28.85 to -4.765	Yes	***	0.0007
		R2: Eu vs. R3:MAC21	-3.11	-15.15 to 8.935	No	ns	0.9936
		R2: Eu vs. R4: Eu	6.51	-5.535 to 18.55	No	ns	0.7191
		R2: Eu vs. R4:MAC21	10.29	-1.755 to 22.33	No	ns	0.1571
		R2:MAC21 vs. R3: Eu	-27.64	-39.68 to -15.60	Yes	****	< 0.0001
		R2:MAC21 vs. R3:MAC21	-13.94	-25.98 to -1.895	Yes	*	0.0111
		R2:MAC21 vs. R4: Eu	-4.32	-16.36 to 7.725	No	ns	0.9575
		R2:MAC21 vs. R4:MAC21	-0.54	-12.58 to 11.50	No	ns	> 0.9999
		R3: Eu vs. R3:MAC21	13.7	1.655 to 25.74	Yes	*	0.0136
		R3: Eu vs. R4: Eu	23.32	11.28 to 35.36	Yes	****	< 0.0001
		R3: Eu vs. R4:MAC21	27.1	15.06 to 39.14	Yes	****	< 0.0001
		R3:MAC21 vs. R4: Eu	9.62	-2.425 to 21.66	No	ns	0.2269
		R3:MAC21 vs. R4:MAC21	13.4	1.355 to 25.44	Yes	*	0.0175
		R4: Eu vs. R4:MAC21	3.78	-8.265 to 15.82	No	ns	0.9797
