# Supplementary material for: A non-mosaic transchromosomic mouse model of Down syndrome carrying the long arm of human chromosome 21
Source: eLife. 2020 Jun 29;9:e56223. doi: 10.7554/eLife.56223 (PMC7358007; doi:10.7554/eLife.56223)
Supplement: Table 1—source data 1. — PCG content of HSA21p vs. HSA21q. [file elife-56223-table1-data1.xlsx]

## Sheet: Table 1–data 1A HSA21 MMU comp
HSA21	Gene name	Having mouse orthologs?	start (bp)	end (bp)	Karyotype band	MMU 16	Gene name	Having HSA21 orthologs?	start (bp)	end (bp)	Karyotype band
	POTED	N	13609858	13641585	q11.2
	LIPI	Y	14108813	14210891	q11.2		Lipi	Y	75540514	75586061	C3.1
	RBM11	Y	14216130	14228372	q11.2		Rbm11	Y	75592844	75602829	C3.1
	HSPA13	Y	14371115	14383484	q11.2		Hspa13	Y	75745431	75767104	C3.1
	SAMSN1	Y	14485228	14583402	q11.2		Samsn1	Y	75858793	76022281	C3.1
	NRIP1	Y	14961235	15065936	q21.1		Nrip1	Y	76287400	76373827	C3.1
	USP25	Y	15730025	15880069	q21.1		Usp25	Y	77013706	77116780	C3.1
							Gm11146	N	77588578	77602094	C3.1
	CXADR	Y	17512382	17593579	q21.1		Cxadr	Y	78301489	78359774	C3.1
	BTG3	Y	17593653	17612947	q21.1		Btg3	Y	78332637	78377192	C3.1
	C21orf91	Y	17788967	17819386	q21.1		D16Ertd472e	Y	78540338	78576708	C3.1
	CHODL	Y	17901263	18267373	q21.1		Chodl	Y	78930948	78951733	C3.1
	TMPRSS15	Y	18269116	18485879	q21.1		Tmprss15	Y	78953008	79091097	C3.2
	NCAM2	Y	20998315	21543329	q21.1		Ncam2	Y	81200697	81626828	C3.3
							Gm21833	N	82828382	82829881	C3.3
							A730009L09Rik	N	84515121	84523888	C3.3
	MRPL39	Y	25585656	25607517	q21.3		Mrpl39	Y	84717576	84735742	C3.3
	JAM2	Y	25639272	25717562	q21.3		Jam2	Y	84774123	84825928	C3.3
	ATP5J(ATP5PF)	Y	25716503	25735673	q21.3		Atp5j	Y	84827866	84835625	C3.3
	GABPA	Y	25734570	25772460	q21.3		Gabpa	Y	84834925	84863779	C3.3
	APP	Y	25880550	26171128	q21.3		App	Y	84949685	85173766	C3.3
	CYYR1	Y	26466209	26573284	q21.3		Cyyr1	Y	85421533	85553397	C3.3
	ADAMTS1	Y	26835747	26845409	q21.3		Adamts1	Y	85793827	85803113	C3.3
	ADAMTS5	Y	26917912	26966513	q21.3		Adamts5	Y	85856173	85901828	C3.3
	N6AMT1	Y	28872191	28885371	q21.3		N6amt1	Y	87354185	87368742	C3.3
	LTN1	Y	28928144	28992956	q21.3		Ltn1	Y	87376651	87432612	C3.3
	RWDD2B	Y	29004384	29019378	q21.3		Rwdd2b	Y	87433407	87440573	C3.3
	USP16	Y	29024629	29054488	q21.3		Usp16	Y	87454703	87483517	C3.3
	CCT8	Y	29055805	29073797	q21.3		Cct8	Y	87483326	87495873	C3.3
	MAP3K7CL	Y	29077471	29175889	q21.3		Map3k7cl	Y	87553330	87595336	C3.3
	BACH1	Y	29194071	29630751	q21.3		Bach1	Y	87698945	87733346	C3.3
	GRIK1	Y	29536933	29940033	q21.3		Grik1	Y	87895900	88290265	C3.3
	CLDN17	Y	30165564	30166756	q21.3		Cldn17	Y	88505807	88506978	C3.3
	CLDN8	Y	30214006	30216073	q22.11		Cldn8	Y	88560828	88563183	C3.3
KRTAP region 1	KRTAP24-1		30281309	30282958	q22.11		Krtap24-1		88610705	88612279	C3.3
	KRTAP25-1		30289145	30289514	q22.11		2310079G19Rik		88626786	88627666	C3.3
	KRTAP26-1		30319124	30320316	q22.11		Krtap26-1		88646824	88647796	C3.3
	KRTAP27-1		30337013	30337694	q22.11		Krtap27-1		88671026	88671671	C3.3
	KRTAP23-1		30348399	30348609	q22.11		2310061N02Rik		88707169	88707962	C3.3
	KRTAP13-2		30371391	30372257	q22.11		Krtap13-1		88728862	88729611	C3.3
	KRTAP13-1		30396074	30396822	q22.11		Krtap13		88750744	88751635	C3.3
	KRTAP13-3		30425265	30425968	q22.11		2310034C09Rik		88758847	88759792	C3.3
	KRTAP13-4		30430230	30431026	q22.11		2310057N15Rik		88773179	88774206	C3.3
	KRTAP15-1		30440275	30440945	q22.11		Gm5965		88777896	88778728	C3.3
	KRTAP19-1		30479699	30480344	q22.11		Gm20741		88811440	88812220	C3.3
	KRTAP19-2		30487057	30487436	q22.11		Krtap14		88818667	88826145	C3.3
	KRTAP19-3		30491464	30491985	q22.11		Krtap15		88820215	88829844	C3.3
	KRTAP19-4		30496824	30497133	q22.11		Krtap19-1		88868917	88869411	C3.3
	KRTAP19-5		30501657	30502117	q22.11		Krtap19-2		88873627	88874269	C3.3
	KRTAP19-6		30541535	30541864	q22.11		Krtap19-3		88877513	88878038	C3.3
	KRTAP19-7		30560875	30561314	q22.11		Krtap19-4		88884786	88885089	C3.3
	KRTAP22-2		30590105	30590397	q22.11		Krtap19-5		88895968	88896457	C3.3
	KRTAP6-3		30592440	30593075	q22.11		Krtap19-9b		88931804	88932265	C3.3
	KRTAP6-2		30598590	30598902	q22.11		Krtap16-3		88962273	88962873	C3.3
	KRTAP22-1		30601087	30601382	q22.11		Krtap22-2		89010395	89010759	C3.3
	KRTAP6-1		30613431	30613930	q22.11		Gm10229		89015284	89015846	C3.3
	KRTAP20-1		30616425	30616699	q22.11		Krtap6-1		89031699	89032292	C3.3
	KRTAP20-4		30620627	30620850	q22.11		Gm10228		89040923	89041472	C3.3
	KRTAP20-2		30635236	30635619	q22.11		Krtap6-5		89047289	89047883	C3.3
	KRTAP20-3		30642864	30643136	q22.11		1110025L11Rik		89063412	89064002	C3.3
	KRTAP21-3		30718525	30718777	q22.11		Krtap6-3		89084015	89084534	C3.3
	KRTAP21-2		30746794	30747233	q22.11		Gm6358		89140851	89141339	C3.3
	KRTAP21-1		30754830	30755428	q22.11		Gm10061		89151086	89151550	C3.3
	KRTAP8-1		30812697	30813252	q22.11		Gm9789		89157952	89158348	C3.3
	KRTAP7-1		30829039	30829759	q22.11		Gm7735		89169490	89169648	C3.3
	KRTAP11-1		30880644	30881555	q22.11		1110057P08Rik		89174735	89175199	C3.3
	KRTAP19-8		31038159	31038476	q22.11		Krtap20-2		89205861	89206394	C3.3
							Krtap21-1		89403218	89403868	C3.3
							Krtap6-2		89419326	89420111	C3.3
							Krtap8-1		89487379	89487952	C3.3
							Krtap7-1		89507703	89508323	C3.3
							Krtap11-1		89570176	89571183	C3.3
	TIAM1	Y	31118416	31559977	q22.11		Tiam1	Y	89787111	90143769	C3.3
	SOD1	Y	31659622	31668931	q22.11		Sod1	Y	90220754	90226329	C3.3
	SCAF4	Y	31671033	31732075	q22.11		Scaf4	Y	90225680	90284503	C3.3
	HUNK	Y	31873315	32044633	q22.11		Hunk	Y	90386013	90499553	C3.3
	MIS18A	Y	32268219	32279069	q22.11		Mis18a	Y	90719312	90727404	C3.3
	MRAP	Y	32291813	32314784	q22.11		Mrap	Y	90738207	90749785	C3.3
	URB1	Y	32311018	32393026	q22.11		Urb1	Y	90751527	90810413	C3.3
	EVA1C	Y	32412006	32515397	q22.11		Eva1c	Y	90826719	90905109	C3.3
	TCP10L	N	32574841	32587373	q22.11
	C21orf59(CFAP298)	Y	32592079	32612866	q22.11		Cfap298	Y	90925809	90935114	C3.3
	SYNJ1	Y	32628759	32728048	q22.11		Synj1	Y	90936092	91011308	C3.3
	PAXBP1	Y	32733899	32771858	q22.11		Paxbp1	Y	91014037	91044543	C3.3
	C21orf62	Y	32793564	32813743	q22.11		4932438H23Rik	Y	91053935	91095122	C3.3
	OLIG2	Y	33025845	33029196	q22.11		Olig2	Y	91225457	91228677	C3.3
	OLIG1	Y	33070144	33072420	q22.11		Olig1	Y	91269772	91271933	C3.3
	IFNAR2	Y	33229901	33265675	q22.11		Ifnar2	Y	91372783	91405589	C3.3
	AP000295.1	Y	33246774	33283212	q22.11		Il10rb	Y	91406164	91425834	C3.3
							Gm21970	N	91391721	91419451	C3.3
	IL10RB	Y	33266358	33310187	q22.11		Il10rb	Y	91406164	91425834	C3.3
	IFNAR1	Y	33324477	33359862	q22.11		Ifnar1	Y	91485238	91507441	C3.3
	IFNGR2	Y	33402896	33479348	q22.11		Ifngr2	Y	91547072	91565623	C3.3
	TMEM50B	Y	33432485	33480011	q22.11		Tmem50b	Y	91574503	91597800	C3.3
	DNAJC28	Y	33485530	33491720	q22.11		Dnajc28	Y	91614254	91619026	C3.3
	GART	Y	33503931	33543491	q22.11		Gart	Y	91621186	91646952	C3.3
	SON	Y	33542618	33577481	q22.11		Son	Y	91647506	91679221	C3.3
	DONSON	Y	33559542	33588708	q22.11		Donson	Y	91676808	91688770	C4
	AP000311.1	N	33584687	33931607	q22.11		Atp5o	Y	91925214	91931687	C4
	CRYZL1	Y	33589341	33643926	q22.11		Cryzl1	Y	91689322	91728975	C4
	ITSN1	Y	33642400	33899861	q22.11		Itsn1	Y	91729281	91920597	C4
	ATP5O	Y	33903453	33915980	q22.11		Atp5o	Y	91925214	91931687	C4
	MRPS6	Y	34073224	34143034	q22.11		Mrps6	Y	92058270	92112227	C4
							Gm49711	N	92058316	92187341	C4
	SLC5A3	Y	34073570	34106262	q22.11		Slc5a3	Y	92058322	92087473	C4
	KCNE2	Y	34364024	34371389	q22.11		Kcne2	Y	92292389	92298129	C4
	SMIM11(SMIM11A)	Y	34375480	34407866	q22.11		Smim11	Y	92301286	92313041	C4
	C21orf140(FAM243A)	Y	34400317	34401072	q22.12		Fam243	Y	92318765	92321441	C4
	AP000322.1(SMIM34A)	N	34418715	34423966	q22.12
	KCNE1	Y	34446688	34512275	q22.12		Kcne1	Y	92345982	92359468	C4
	RCAN1	Y	34513142	34615142	q22.12		Rcan1	Y	92391953	92470867	C4
	CLIC6	Y	34669389	34718227	q22.12		Clic6	Y	92485736	92541243	C4
	RUNX1	Y	34787801	36004667	q22.12		Runx1	Y	92601466	92826149	C4
	SETD4	Y	36034541	36079389	q22.12		Setd4	Y	93583457	93604063	C4
	CBR1	Y	36069941	36073166	q22.12		Cbr1	Y	93605853	93610505	C4
							Gm5678	N	93628097	93630451	C4
	CBR3	Y	36134912	36146566	q22.12		Cbr3	Y	93683215	93690990	C4
	DOPEY2(DOP1B)	Y	36156782	36294274	q22.12		Dop1b	Y	93711904	93810590	C4
	MORC3	Y	36320189	36386148	q22.12		Morc3	Y	93832121	93876073	C4
	CHAF1B	Y	36385378	36419015	q22.12		Chaf1b	Y	93883901	93906115	C4
	CLDN14	Y	36460621	36576569	q22.13		Cldn14	Y	93919031	94008837	C4
	SIM2	Y	36699133	36749917	q22.13		Sim2	Y	94084931	94127032	C4
	HLCS	Y	36750888	36990236	q22.13		Hlcs	Y	94128882	94313571	C4
	RIPPLY3	Y	37006150	37019659	q22.13		Ripply3	Y	94328420	94336935	C4
	PIGP	Y	37059170	37073170	q22.13		Pigp	Y	94358763	94371842	C4
	TTC3	Y	37073226	37203112	q22.13		Ttc3	Y	94370618	94469343	C4
	DSCR3(VPS26C)	Y	37223420	37267919	q22.13		Vps26c	Y	94497783	94526830	C4
	DYRK1A	Y	37365790	37517450	q22.13		Dyrk1a	Y	94570010	94695517	C4
	KCNJ6	Y	37607376	37916446	q22.13		Kcnj6	Y	94748636	94997701	C4
	KCNJ15	Y	38157034	38307357	q22.13		Kcnj15	Y	95257558	95300260	C4
	ERG	Y	38380027	38661780	q22.2		Erg	Y	95359169	95586593	C4
	ETS2	Y	38805307	38824955	q22.2		Ets2	Y	95702075	95721051	C4
	PSMG1	Y	39174769	39183851	q22.2		Psmg1	Y	95979933	95990960	C4
	BRWD1	Y	39184176	39321559	q22.2		Brwd1	Y	95992092	96082526	C4
	HMGN1	Y	39342315	39349647	q22.2		Hmgn1	Y	96120618	96127729	C4
	WRB	Y	39380244	39428528	q22.2		Wrb	Y	96145407	96157852	C4
	LCA5L	Y	39405844	39445805	q22.2		Lca5l	Y	96158407	96192271	C4
	SH3BGR	Y	39445855	39515506	q22.2		Sh3bgr	Y	96200450	96228935	C4
	B3GALT5	Y	39556442	39673137	q22.2		B3galt5	Y	96235801	96319859	C4
	IGSF5	Y	39745407	39802096	q22.2		Igsf5	Y	96361668	96422121	C4
							Gm49948	N	96361794	96525580	C4
							Itgb2l	N	96422288	96443619	C4
	PCP4	Y	39867317	39929397	q22.2		Pcp4	Y	96467606	96525793	C4
	DSCAM	Y	40010999	40847139	q22.2		Dscam	Y	96590840	97170752	C4
	BACE2	Y	41167801	41282518	q22.2		Bace2	Y	97356742	97442936	C4
	FAM3B	Y	41304212	41357431	q22.3		Mx1	Y	97447035	97462907	C4
	MX2	Y	41361943	41409390	q22.3		Fam3b	Y	97470965	97514816	C4
	MX1	Y	41420304	41459214	q22.3		Mx2	Y	97535308	97560900	C4
	TMPRSS2	Y	41464551	41531116	q22.3		Tmprss2	Y	97564682	97611195	C4
	RIPK4	Y	41739369	41767106	q22.3		Ripk4	Y	97741933	97763787	C4
	PRDM15	Y	41798225	41879482	q22.3		Prdm15	Y	97791467	97851850	C4
	C2CD2	Y	41885112	41953890	q22.3		C2cd2	Y	97855209	97962598	C4
	ZBTB21	Y	41986831	42010387	q22.3		Zbtb21	Y	97943357	97962622	C4
							B230307C23Rik		97997315	98031801	C4
							A630089N07Rik		98001310	98082450	C4
	UMODL1		42062959	42143453	q22.3	MMU17	Umodl1	Y	30954640	31010710	A3.3
	ABCG1		42199689	42297244	q22.3		Abcg1	Y	31057675	31117988	A3.3
	TFF3		42311667	42315651	q22.3		Tff3	Y	31125306	31129646	A3.3
	TFF2		42346357	42351128	q22.3		Tff2	Y	31141049	31144282	A3.3
	TFF1		42362282	42366594	q22.3		Tff1	Y	31161395	31165277	A3.3
	TMPRSS3		42371890	42396846	q22.3		Tmprss3	Y	31179265	31198977	A3.3
	UBASH3A		42403447	42447681	q22.3		Ubash3a	Y	31207873	31246892	A3.3
	RSPH1		42472486	42496354	q22.3		Rsph1	Y	31255019	31277383	A3.3
	SLC37A1		42496008	42581440	q22.3		Slc37a1	Y	31286792	31350739	A3.3
	PDE9A		42653636	42775509	q22.3		Pde9a	Y	31386210	31476310	B1
	WDR4		42843094	42879568	q22.3		Wdr4	Y	31494322	31519980	B1
	NDUFV3		42879644	42913304	q22.3		Ndufv3	Y	31520115	31531331	B1
	PKNOX1		42974510	43033931	q22.3		Pknox1	Y	31564734	31607693	B1
	CBS		43053191	43076943	q22.3		Cbs	Y	31608894	31637238	B1
	U2AF1		43092956	43107587	q22.3		U2af1	Y	31647081	31658892	B1
	CRYAA		43169008	43172805	q22.3		Cryaa	Y	31677807	31681733	B1
	SIK1		43414515	43427128	q22.3		Sik1	Y	31844250	31855804	B1
	HSF2BP		43529192	43659493	q22.3		Hsf2bp	Y	31944769	32036349	B1
	H2BFS		43565189	43565648	q22.3
	RRP1B		43659548	43696079	q22.3		Rrp1b	Y	32036100	32062865	B1
	PDXK		43719094	43762307	q22.3	MMU10	Pdxk	Y	78436744	78464975	C1
	CSTB		43772511	43776445	q22.3		Cstb	Y	78425669	78427622	C1
	RRP1		43789513	43805293	q22.3		Rrp1	Y	78400384	78413043	C1
	AGPAT3		43865186	43986536	q22.3		Agpat3	Y	78269178	78352489	C1
	TRAPPC10		44012319	44106552	q22.3		Trappc10	Y	78186725	78244641	C1
	PWP2		44107290	44131181	q22.3		Pwp2	Y	78170909	78185149	C1
	C21orf33(GATD3A)		44133605	44145723	q22.3		Gatd3a	Y	78162066	78169782	C1
	ICOSLG		44222991	44240966	q22.3		Icosl	Y	78069302	78083913	C1
	DNMT3L		44246339	44262216	q22.3		Dnmt3l	Y	78041947	78063622	C1
	AIRE		44285838	44298648	q22.3		Aire	Y	78030022	78043610	C1
	PFKL		44300051	44327376	q22.3		Pfkl	Y	77986947	78010083	C1
	C21orf2(CFAP410)		44328944	44339402	q22.3		Cfap410	Y	77978524	77986905	C1
	TRPM2		44350163	44443081	q22.3		Trpm2	Y	77907722	77970563	C1
	LRRC3		44455486	44462196	q22.3		Lrrc3	Y	77897575	77902536	C1
KRTAP region 2	KRTAP10-1		44538981	44540195	q22.3		Gm3285		77861975	77862882	C1
	KRTAP10-2		44550357	44551505	q22.3		Gm10318		77852859	77853788	C1
	KRTAP10-3		44557790	44558760	q22.3		Gm36176		77846803	77847303	C1
	KRTAP10-4		44573724	44638284	q22.3		Krtap10-10		77835947	77837252	C1
	KRTAP10-5		44579455	44580604	q22.3		Krtap10-4		77826115	77827095	C1
	KRTAP10-6		44591268	44592505	q22.3		Gm49918		77814682	77836652	C1
	KRTAP10-7		44600597	44602174	q22.3		Gm9507		77810967	77811843	C1
	KRTAP10-8		44612079	44612954	q22.3		Gm19668		77798387	77799133	C1
	KRTAP10-9		44627123	44628293	q22.3		Gm9639		77794399	77795076	C1
	KRTAP10-10		44637356	44638455	q22.3		Gm7137		77787490	77788200	C1
	KRTAP10-11		44646414	44647650	q22.3		Gm3250		77781850	77782542	C1
	KRTAP12-4		44654213	44654659	q22.3		Gm7138		77776252	77776944	C1
	KRTAP12-3		44657932	44658341	q22.3		Gm3238		77770633	77771325	C1
	KRTAP12-2		44666189	44666927	q22.3		Gm3233		77758990	77759682	C1
	KRTAP12-1		44681576	44682163	q22.3		Gm9736		77750521	77751354	C1
	KRTAP10-12		44697172	44698044	q22.3		Gm18596		77741796	77742638	C1
							Gm10100		77726486	77726848	C1
							Krtap12-1		77720599	77721254	C1
							Gm10142		77715807	77716169	C1
							Gm10024		77711457	77712009	C1
							Gm10272		77706626	77706975	C1
							Gm9508		77696541	77697233	C1
							Gm19402		77689957	77690757	C1
	TSPEAR		44497892	44711580	q22.3		Tspear	Y	77686569	77887021	C1
	UBE2G2		44768580	44802019	q22.3		Ube2g2	Y	77622275	77645993	C1
							Gm49325		77606197	77641543	C1
	SUMO3		44805617	44818779	q22.3		Sumo3	Y	77606097	77618331	C1
	PTTG1IP		44849585	44873903	q22.3		Pttg1ip	Y	77581720	77598732	C1
	ITGB2		44885953	44931989	q22.3		Itgb2	Y	77530252	77565708	C1
	FAM207A		44940010	44976989	q22.3		Fam207a	Y	77486661	77515785	C1
	ADARB1		45073853	45226560	q22.3		Adarb1	Y	77290726	77418270	C1
	POFUT2		45263928	45287898	q22.3		Pofut2	Y	77259218	77269575	C1
	COL18A1		45405137	45513720	q22.3		Col18a1	Y	77052178	77166548	C1
	SLC19A1		45493572	45544411	q22.3		Slc19a1	Y	77032241	77061002	C1
	PCBP3		45643694	45942454	q22.3		Pcbp3	Y	76761857	76961887	C1
	COL6A1		45981737	46005050	q22.3		Col6a1	Y	76708792	76726168	C1
	COL6A2		46098097	46132849	q22.3		Col6a2	Y	76595762	76623630	C1
	FTCD		46136262	46155567	q22.3		Ftcd	Y	76575648	76590338	C1
	SPATC1L		46161148	46184476	q22.3		Spatc1l	Y	76562272	76570201	C1
	LSS		46188141	46228824	q22.3		Lss	Y	76531588	76557138	C1
	MCM3AP		46235126	46286297	q22.3		Mcm3ap	Y	76468927	76515857	C1
	YBEY		46286337	46297751	q22.3		Ybey	Y	76459567	76469114	C1
	C21orf58		46300181	46323875	q22.3		2610028H24Rik	Y	76449081	76461110	C1
							AC141477.1		76440241	76440444	C1
	PCNT		46324122	46445769	q22.3		Pcnt	Y	76351263	76442786	C1
	DIP2A		46458899	46569852	q22.3		Dip2a	Y	76259429	76345291	C1
	S100B		46598962	46605208	q22.3		S100b	Y	76253853	76261159	C1
	PRMT2		46635595	46665124	q22.3		Prmt2	Y	76207222	76237865	C1

## Sheet: Table 1–data 1B damaged Tc1 PCG
						Damaged analysis is based on Gribble, S. M., et al. (2013).
HSA21	Gene name	Having mouse orthologs?	start (bp)	end (bp)	Karyotype band	Copy number on Tc1-Hsa21	Structurally rearranged on Tc1-Hsa21	disrupted
	POTED	N	13609858	13641585	q11.2	copy number1
	LIPI	Y	14108813	14210891	q11.2	partially duplicated		Y
	RBM11	Y	14216130	14228372	q11.2	duplicated		Y
	HSPA13	Y	14371115	14383484	q11.2	duplicated		Y
	SAMSN1	Y	14485228	14583402	q11.2	duplicated		Y
	NRIP1	Y	14961235	15065936	q21.1	duplicated		Y
	USP25	Y	15730025	15880069	q21.1	duplicated		Y
	CXADR	Y	17512382	17593579	q21.1	copy number1
	BTG3	Y	17593653	17612947	q21.1	deleted		Y
	C21orf91	Y	17788967	17819386	q21.1	deleted		Y
	CHODL	Y	17901263	18267373	q21.1	deleted		Y
	TMPRSS15	Y	18269116	18485879	q21.1	partially deleted	Rearranged	Y
	NCAM2	Y	20998315	21543329	q21.1	partially duplicated	Rearranged	Y
	MRPL39	Y	25585656	25607517	q21.3	copy number1
	JAM2	Y	25639272	25717562	q21.3	copy number1
	ATP5J(ATP5PF)	Y	25716503	25735673	q21.3	copy number1
	GABPA	Y	25734570	25772460	q21.3	copy number1
	APP	Y	25880550	26171128	q21.3	copy number1	Rearranged	Y
	CYYR1	Y	26466209	26573284	q21.3	copy number1
	ADAMTS1	Y	26835747	26845409	q21.3	copy number1
	ADAMTS5	Y	26917912	26966513	q21.3	copy number1
	N6AMT1	Y	28872191	28885371	q21.3	copy number1
	LTN1	Y	28928144	28992956	q21.3	copy number1
	RWDD2B	Y	29004384	29019378	q21.3	copy number1
	USP16	Y	29024629	29054488	q21.3	copy number1
	CCT8	Y	29055805	29073797	q21.3	copy number1
	MAP3K7CL	Y	29077471	29175889	q21.3	copy number1
	BACH1	Y	29194071	29630751	q21.3	copy number1
	GRIK1	Y	29536933	29940033	q21.3	copy number1
	CLDN17	Y	30165564	30166756	q21.3	copy number1
	CLDN8	Y	30214006	30216073	q22.11	copy number1
KRTAP region 1	KRTAP24-1		30281309	30282958	q22.11	copy number1
	KRTAP25-1		30289145	30289514	q22.11	copy number1
	KRTAP26-1		30319124	30320316	q22.11	copy number1
	KRTAP27-1		30337013	30337694	q22.11	copy number1
	KRTAP23-1		30348399	30348609	q22.11	copy number1
	KRTAP13-2		30371391	30372257	q22.11	copy number1
	KRTAP13-1		30396074	30396822	q22.11	copy number1
	KRTAP13-3		30425265	30425968	q22.11	copy number1
	KRTAP13-4		30430230	30431026	q22.11	copy number1
	KRTAP15-1		30440275	30440945	q22.11	copy number1
	KRTAP19-1		30479699	30480344	q22.11	copy number1
	KRTAP19-2		30487057	30487436	q22.11	copy number1
	KRTAP19-3		30491464	30491985	q22.11	copy number1
	KRTAP19-4		30496824	30497133	q22.11	copy number1
	KRTAP19-5		30501657	30502117	q22.11	copy number1
	KRTAP19-6		30541535	30541864	q22.11	copy number1
	KRTAP19-7		30560875	30561314	q22.11	copy number1
	KRTAP22-2		30590105	30590397	q22.11	copy number1
	KRTAP6-3		30592440	30593075	q22.11	copy number1
	KRTAP6-2		30598590	30598902	q22.11	copy number1
	KRTAP22-1		30601087	30601382	q22.11	copy number1
	KRTAP6-1		30613431	30613930	q22.11	copy number1
	KRTAP20-1		30616425	30616699	q22.11	copy number1
	KRTAP20-4		30620627	30620850	q22.11	copy number1
	KRTAP20-2		30635236	30635619	q22.11	copy number1
	KRTAP20-3		30642864	30643136	q22.11	copy number1
	KRTAP21-3		30718525	30718777	q22.11	copy number1
	KRTAP21-2		30746794	30747233	q22.11	copy number1
	KRTAP21-1		30754830	30755428	q22.11	copy number1
	KRTAP8-1		30812697	30813252	q22.11	copy number1
	KRTAP7-1		30829039	30829759	q22.11	copy number1
	KRTAP11-1		30880644	30881555	q22.11	copy number1
	KRTAP19-8		31038159	31038476	q22.11	copy number1
	TIAM1	Y	31118416	31559977	q22.11	copy number1
	SOD1	Y	31659622	31668931	q22.11	copy number1
	SCAF4	Y	31671033	31732075	q22.11	copy number1
	HUNK	Y	31873315	32044633	q22.11	copy number1
	MIS18A	Y	32268219	32279069	q22.11	deleted		Y
	MRAP	Y	32291813	32314784	q22.11	deleted		Y
	URB1	Y	32311018	32393026	q22.11	deleted		Y
	EVA1C	Y	32412006	32515397	q22.11	deleted		Y
	TCP10L	N	32574841	32587373	q22.11	deleted		Y
	C21orf59(CFAP298)	Y	32592079	32612866	q22.11	deleted		Y
	SYNJ1	Y	32628759	32728048	q22.11	deleted		Y
	PAXBP1	Y	32733899	32771858	q22.11	deleted		Y
	C21orf62	Y	32793564	32813743	q22.11	deleted		Y
	OLIG2	Y	33025845	33029196	q22.11	deleted		Y
	OLIG1	Y	33070144	33072420	q22.11	deleted		Y
	IFNAR2	Y	33229901	33265675	q22.11	deleted		Y
	AP000295.1	Y	33246774	33283212	q22.11			Y
	IL10RB	Y	33266358	33310187	q22.11	deleted		Y
	IFNAR1	Y	33324477	33359862	q22.11	deleted		Y
	IFNGR2	Y	33402896	33479348	q22.11	deleted		Y
	TMEM50B	Y	33432485	33480011	q22.11	deleted		Y
	DNAJC28	Y	33485530	33491720	q22.11	deleted		Y
	GART	Y	33503931	33543491	q22.11	deleted		Y
	SON	Y	33542618	33577481	q22.11	deleted		Y
	DONSON	Y	33559542	33588708	q22.11	deleted		Y
	AP000311.1	N	33584687	33931607	q22.11			Y
	CRYZL1	Y	33589341	33643926	q22.11	deleted		Y
	ITSN1	Y	33642400	33899861	q22.11	deleted		Y
	ATP5O	Y	33903453	33915980	q22.11	deleted		Y
	MRPS6	Y	34073224	34143034	q22.11	deleted		Y
	SLC5A3	Y	34073570	34106262	q22.11	deleted		Y
	KCNE2	Y	34364024	34371389	q22.11	deleted		Y
	SMIM11(SMIM11A)	Y	34375480	34407866	q22.11	deleted		Y
	C21orf140(FAM243A)	Y	34400317	34401072	q22.12			Y
	AP000322.1(SMIM34A)	N	34418715	34423966	q22.12			Y
	KCNE1	Y	34446688	34512275	q22.12	deleted		Y
	RCAN1	Y	34513142	34615142	q22.12	deleted		Y
	CLIC6	Y	34669389	34718227	q22.12	deleted		Y
	RUNX1	Y	34787801	36004667	q22.12	partially deleted	Rearranged	Y
	SETD4	Y	36034541	36079389	q22.12	copy number1
	CBR1	Y	36069941	36073166	q22.12	copy number1
	CBR3	Y	36134912	36146566	q22.12	copy number1
	DOPEY2(DOP1B)	Y	36156782	36294274	q22.12	copy number1
	MORC3	Y	36320189	36386148	q22.12	copy number1
	CHAF1B	Y	36385378	36419015	q22.12	copy number1
	CLDN14	Y	36460621	36576569	q22.13	copy number1
	SIM2	Y	36699133	36749917	q22.13	copy number1
	HLCS	Y	36750888	36990236	q22.13	copy number1
	RIPPLY3	Y	37006150	37019659	q22.13	copy number1
	PIGP	Y	37059170	37073170	q22.13	copy number1
	TTC3	Y	37073226	37203112	q22.13	copy number1
	DSCR3(VPS26C)	Y	37223420	37267919	q22.13	copy number1
	DYRK1A	Y	37365790	37517450	q22.13	copy number1
	KCNJ6	Y	37607376	37916446	q22.13	copy number1
	KCNJ15	Y	38157034	38307357	q22.13	copy number1
	ERG	Y	38380027	38661780	q22.2	copy number1
	ETS2	Y	38805307	38824955	q22.2	copy number1
	PSMG1	Y	39174769	39183851	q22.2	copy number1
	BRWD1	Y	39184176	39321559	q22.2	copy number1
	HMGN1	Y	39342315	39349647	q22.2	copy number1
	WRB	Y	39380244	39428528	q22.2	copy number1
	LCA5L	Y	39405844	39445805	q22.2	copy number1
	SH3BGR	Y	39445855	39515506	q22.2	copy number1
	B3GALT5	Y	39556442	39673137	q22.2	copy number1
	IGSF5	Y	39745407	39802096	q22.2	copy number1
	PCP4	Y	39867317	39929397	q22.2	copy number1
	DSCAM	Y	40010999	40847139	q22.2	copy number1
	BACE2	Y	41167801	41282518	q22.2	copy number1
	FAM3B	Y	41304212	41357431	q22.3	copy number1
	MX2	Y	41361943	41409390	q22.3	copy number1
	MX1	Y	41420304	41459214	q22.3	copy number1
	TMPRSS2	Y	41464551	41531116	q22.3	copy number1
	RIPK4	Y	41739369	41767106	q22.3	copy number1
	PRDM15	Y	41798225	41879482	q22.3	copy number1
	C2CD2	Y	41885112	41953890	q22.3	copy number1
	ZBTB21	Y	41986831	42010387	q22.3	copy number1
	UMODL1		42062959	42143453	q22.3	copy number1
	ABCG1		42199689	42297244	q22.3	copy number1
	TFF3		42311667	42315651	q22.3	copy number1
	TFF2		42346357	42351128	q22.3	copy number1
	TFF1		42362282	42366594	q22.3	copy number1
	TMPRSS3		42371890	42396846	q22.3	copy number1
	UBASH3A		42403447	42447681	q22.3	copy number1
	RSPH1		42472486	42496354	q22.3	copy number1
	SLC37A1		42496008	42581440	q22.3	copy number1
	PDE9A		42653636	42775509	q22.3	copy number1
	WDR4		42843094	42879568	q22.3	copy number1
	NDUFV3		42879644	42913304	q22.3	copy number1	Rearranged	1
	PKNOX1		42974510	43033931	q22.3	copy number1
	CBS		43053191	43076943	q22.3	copy number1
	U2AF1		43092956	43107587	q22.3	copy number1
	CRYAA		43169008	43172805	q22.3	copy number1
	SIK1		43414515	43427128	q22.3	copy number1
	HSF2BP		43529192	43659493	q22.3	copy number1
	H2BFS		43565189	43565648	q22.3
	RRP1B		43659548	43696079	q22.3	copy number1
	PDXK		43719094	43762307	q22.3	copy number1
	CSTB		43772511	43776445	q22.3	copy number1
	RRP1		43789513	43805293	q22.3	copy number1
	AGPAT3		43865186	43986536	q22.3	copy number1
	TRAPPC10		44012319	44106552	q22.3	copy number1
	PWP2		44107290	44131181	q22.3	copy number1
	C21orf33(GATD3A)		44133605	44145723	q22.3	copy number1
	ICOSLG		44222991	44240966	q22.3	copy number1
	DNMT3L		44246339	44262216	q22.3	copy number1
	AIRE		44285838	44298648	q22.3	copy number1
	PFKL		44300051	44327376	q22.3	copy number1
	C21orf2(CFAP410)		44328944	44339402	q22.3	copy number1
	TRPM2		44350163	44443081	q22.3	copy number1	Rearranged	1
	LRRC3		44455486	44462196	q22.3	copy number1
	TSPEAR		44497892	44711580	q22.3
KRTAP region 2	KRTAP10-1		44538981	44540195	q22.3	copy number1
	KRTAP10-2		44550357	44551505	q22.3	copy number1
	KRTAP10-3		44557790	44558760	q22.3	copy number1
	KRTAP10-4		44573724	44638284	q22.3	copy number1
	KRTAP10-5		44579455	44580604	q22.3	copy number1
	KRTAP10-6		44591268	44592505	q22.3	copy number1
	KRTAP10-7		44600597	44602174	q22.3	copy number1
	KRTAP10-8		44612079	44612954	q22.3	copy number1
	KRTAP10-9		44627123	44628293	q22.3	copy number1
	KRTAP10-10		44637356	44638455	q22.3	copy number1
	KRTAP10-11		44646414	44647650	q22.3	copy number1
	KRTAP12-4		44654213	44654659	q22.3	copy number1
	KRTAP12-3		44657932	44658341	q22.3	copy number1
	KRTAP12-2		44666189	44666927	q22.3	copy number1
	KRTAP12-1		44681576	44682163	q22.3	copy number1
	KRTAP10-12		44697172	44698044	q22.3	copy number1
	UBE2G2		44768580	44802019	q22.3	copy number1
	SUMO3		44805617	44818779	q22.3	copy number1
	PTTG1IP		44849585	44873903	q22.3	copy number1
	ITGB2		44885953	44931989	q22.3	copy number1
	FAM207A		44940010	44976989	q22.3	copy number1
	ADARB1		45073853	45226560	q22.3	copy number1
	POFUT2		45263928	45287898	q22.3	copy number1
	COL18A1		45405137	45513720	q22.3	partially deleted	Rearranged	1
	SLC19A1		45493572	45544411	q22.3	deleted		1
	PCBP3		45643694	45942454	q22.3	partially deleted	Rearranged	1
	COL6A1		45981737	46005050	q22.3	copy number1
	COL6A2		46098097	46132849	q22.3	copy number1
	FTCD		46136262	46155567	q22.3	copy number1
	SPATC1L		46161148	46184476	q22.3	copy number1
	LSS		46188141	46228824	q22.3	copy number1
	MCM3AP		46235126	46286297	q22.3	copy number1
	YBEY		46286337	46297751	q22.3	copy number1
	C21orf58		46300181	46323875	q22.3	copy number1
	PCNT		46324122	46445769	q22.3	copy number1
	DIP2A		46458899	46569852	q22.3	partially duplicated	Rearranged	1
	S100B		46598962	46605208	q22.3	duplicated		1
	PRMT2		46635595	46665124	q22.3	duplicated		1
